# The structure, binding, and function of a Notch transcription complex involving RBPJ and the epigenetic reader protein L3MBTL3

Daniel Hall<sup>1</sup>, Benedetto Daniele Giaimo<sup>3</sup>, Sung-Soo Park<sup>2</sup>, Wiebke Hemmer<sup>5</sup>, Tobias Friedrich<sup>3</sup>, Francesca Ferrante<sup>3</sup>, Marek Bartkuhn<sup>4</sup>, Zhenyu Yuan<sup>1</sup>, Franz Oswald<sup>5</sup>, Tilman Borggrefe<sup>3</sup>, Jean-François Rual<sup>2</sup>, and Rhett A. Kovall<sup>1</sup>

<sup>1</sup>University of Cincinnati College of Medicine, Department of Molecular Genetics, Biochemistry and Microbiology, Cincinnati, Ohio, USA

<sup>2</sup>Department of Pathology, University of Michigan Medical School, Ann Arbor, MI 48109, USA

<sup>3</sup>Institute of Biochemistry, University of Giessen, 35392 Giessen, Germany

<sup>4</sup>Biomedical Informatics and Systems Medicine, University of Giessen, 35392 Giessen, Germany

<sup>5</sup>University Medical Center Ulm, Center for Internal Medicine, Department of Internal Medicine 1, Albert-Einstein-Allee 23, 89081 Ulm, Germany

## Abstract

The highly conserved Notch pathway transmits signals between neighboring cells to elicit distinct downstream transcriptional programs. In given contexts, Notch is a major regulator of cell fate specification, proliferation, and apoptosis, such that aberrant Notch signaling leads to a pleiotropy of human diseases, including developmental disorders and cancers. The canonical pathway signals through the transcription factor CSL (RBPJ in mammals), which forms a transcriptional activation complex with the intracellular domain of the Notch receptor and the coactivator Mastermind. CSL can also function as a transcriptional repressor by forming complexes with one of several different corepressor proteins, such as FHL1 or SHARP in mammals and Hairless in *Drosophila*. Recently, we identified the malignant brain tumor (MBT) family member L3MBTL3 as a bona fide RBPJ binding corepressor that recruits the repressive lysine demethylase LSD1/KDM1A to Notch target genes. Here we define the RBPJ-interacting domain (RBP-ID) of L3MBTL3 and report the 2.06 Å crystal structure of the complex formed between RBPJ, the RBP-ID of L3MBTL3 and DNA. The structure reveals the molecular interactions underlying L3MBTL3 complexation with RBPJ, which we comprehensively analyze with a series of L3MBTL3 and RBPJ mutations that span the binding interface. Compared to other RBPJ-binding proteins, we find that L3MBTL3 interacts with RBPJ via an unusual binding motif, which is sensitive to mutations throughout its RBPJ-interacting region. We also show that these disruptive mutations affect RBPJ and L3MBTL3 function in cells, providing further insights into Notch mediated transcriptional regulation.

## 46 Introduction

47

48 Notch is a conserved signaling pathway that is critical for proper metazoan  
49 development and homeostasis throughout life<sup>1</sup>. Notch signaling is a transcriptional  
50 regulation mechanism whose gene targets regulate diverse cellular processes, such as  
51 proliferation, differentiation, and apoptosis, depending on the cellular context of the  
52 signal<sup>2</sup>. The pathway is tightly regulated and very sensitive to gene dosage, whereby too  
53 much or too little signaling leads to devastating health outcomes. Many human diseases,  
54 such as certain forms of congenital syndromes, cancers, and cardiovascular disease,  
55 have been linked to mutations in Notch signaling components<sup>1</sup>, and therapeutic  
56 modulation of the pathway is an active area of research due to the current lack of long-  
57 term solutions<sup>3</sup>. One of the goals of Notch targeted therapeutics is to identify small  
58 molecules or biologics that can discriminate between different Notch regulatory  
59 transcriptional complexes<sup>4</sup>.

60 The Notch pathway is activated when a transmembrane Notch receptor on a  
61 signal-receiving cell engages with a transmembrane ligand on an adjacent signal-sending  
62 cell (Fig 1A)<sup>5</sup>. In mammals there are four Notch receptors (NOTCH1/2/3/4) and five  
63 ligands of the DSL (Delta/Serrate/Lag-2) family: JAG1/2 (Jagged1/2) and DLL1/3/4  
64 (Delta-like 1/3/4)<sup>1</sup>. Notch receptors and DSL ligands are large modular multidomain  
65 proteins with a single transmembrane spanning region<sup>5</sup>. Ligand-receptor binding triggers  
66 endocytosis of the extracellular complex by the signal-sending cell, which exerts a pulling  
67 force on the receptor, exposing a cleavage site for ADAM10 (A Disintegrin and  
68 Metalloproteinase 10)<sup>6</sup>. ADAM10 cleavage sheds the extracellular domain while the  
69 membrane-bound Notch intracellular domain (NICD) is cleaved within its transmembrane  
70 region by the gamma-secretase complex, releasing NICD from the cell membrane<sup>5</sup>.  
71 Subsequently, NICD localizes to the nucleus where it forms a transcriptional activation  
72 complex with the transcription factor CSL (CBF1/RBPJ, Su(H), Lag-1) and a member of  
73 the Mastermind family of transcriptional coactivators (MAML1-3, in mammals) (Fig 1A)<sup>7</sup>.  
74 The NTC (Notch transcription complex) recruits the mediator complex and the histone  
75 acetyltransferases P300/CBP (CREB binding protein) to DNA regulatory elements of  
76 Notch target genes to turn “on” transcription<sup>8,9</sup>.

77 Mastermind recruits the CDK8 kinase module, which phosphorylates NICD within  
78 its PEST domain<sup>8</sup>, leading to its recognition by the E3 ubiquitin ligase FBXW7 (F-box and  
79 WD40 repeat protein 7) and ubiquitin-mediated proteasomal degradation of NICD<sup>10,11</sup>.  
80 CSL can also function as a repressor by binding to a diverse repertoire of transcriptional  
81 corepressors, e.g. in mammals, a specific splice variant of FHL1 (Four and half Lim  
82 domains protein 1), also known as KYOT2, RITA1 (RBPJ interacting Tubulin associated  
83 protein 1) and SHARP (SMRT/HDAC1 Associated Repressor Protein), also known as  
84 MINT or SPEN, that are part of higher order multicomponent repression complexes, which  
85 apply repressive marks to histone tails (Fig 1A)<sup>7,12</sup>.

86 CSL is comprised of three structural domains: the NTD (N-terminal domain), BTB  
87 ( $\beta$ -trefoil domain), and CTD (C-terminal domain) (Fig 1B)<sup>13</sup>. These are held in a concise  
88 three-dimensional fold by a single  $\beta$ -strand spanning all three domains of the protein  
89 (colored magenta in Fig 1B). The RAM (RBPJ associated molecule) domain of NICD  
90 forms a high affinity (~20nM) interaction with an exposed hydrophobic surface on the  
91 BTB, tethering the ANK (ankyrin repeats) domain to CSL, which binds only weakly to the

92 CTD<sup>14-16</sup>. Mastermind forms an extended  $\alpha$ -helix that binds a composite surface created  
93 by ANK and CTD, as well as the NTD<sup>16,17</sup>. Several crystal structures of CSL in complex  
94 corepressors have also been solved. For example, in mammals FHL1<sup>18</sup>, RITA1<sup>19</sup>, and  
95 SHARP<sup>20</sup> all have RAM-like motifs that bind to the BTB, illustrating a common binding  
96 mode for corepressors to interact with RBPJ (mammalian CSL)<sup>7,12</sup>. More recently, a novel  
97 RBPJ-binding corepressor, termed L3MBTL3, was identified in a proteomics screen from  
98 a glioma cell line<sup>21</sup>.

99 L3MBTL3 [Lethal (3) malignant brain tumor-like 3] is a member of the malignant  
100 brain tumor (MBT) family of transcriptional repressors that contain between one and four  
101 MBT domains (Fig 2A)<sup>22</sup>. These domains impart the ability to bind mono- and  
102 dimethylated lysine residues on histone tails, with some MBT proteins showing strict  
103 specificity while others, including L3MBTL3, binding promiscuously to methylated lysine  
104 residues<sup>23</sup>. Although the precise mechanism of repression is unknown, L3MBTL3 is a  
105 putative PcG (Polycomb group) protein that likely facilitates chromatin modification and  
106 compaction<sup>24</sup>. More recently, it has become clear that MBT proteins can also recognize  
107 methylated lysines on non-histone proteins as well<sup>25,26</sup>. In this role, L3MBTL3 has been  
108 shown to function as an adaptor for the CRL4<sup>DCAF5</sup> E3 ubiquitin ligase, targeting the DNA  
109 methyltransferase DNMT1 and the stem cell regulator SOX2 for ubiquitin mediated  
110 proteasomal degradation<sup>25</sup>. While all of its roles *in vivo* are still being elucidated, it is  
111 known that germline deletion of L3MBTL3 in mice leads to an overabundance of immature  
112 erythrocytes, causing embryonic lethality by anemia at E18<sup>27</sup>.

113 As shown in Figure 2A, human L3MBTL3 (isoform b) is a 755 residue multidomain  
114 protein comprised of a N-terminal region (~200 residue) that is predicted to be largely  
115 random coil, followed by three MBT domains, a second region of random coil, and a C-  
116 terminal SAM (sterile alpha motif) domain. Additionally, there are two predicted zinc finger  
117 domains, the FCS-type [phenylalanine (F), cysteine (C), serine (S)] and a classical ZnF  
118 type in the N-terminal and C-terminal regions of the protein, respectively. L3MBTL3 binds  
119 methylated lysine residues with its second MBT domain and mutation of Asp 381 within  
120 this domain (denoted as a yellow star in Fig 2A) has been shown to disrupt interactions  
121 with both methyllysine peptides and UNC1215, a potent small molecule inhibitor of  
122 L3MBTL3 methyllysine reader function<sup>28,29</sup>. The SAM domain is involved in homo- and  
123 heteromultimerization of L3MBTL3<sup>30</sup>.

124 Previously, we identified an N-terminal region of L3MBTL3 that was required for  
125 binding to RBPJ (mouse CSL ortholog) *in vitro* and in cells<sup>21</sup> (Fig 2A). Here we further  
126 define this region and isolate an L3MBTL3 peptide that is necessary and sufficient for  
127 interacting with RBPJ. Moreover, we use this information to determine the crystal  
128 structure of the RBPJ-L3MBTL3 corepressor complex bound to DNA, and based on the  
129 structure, we perform a comprehensive thermodynamic binding analysis. Despite the lack  
130 of sequence similarity, we show that L3MBTL3 binds to RBPJ similar to other BTB-  
131 binding proteins, such as the RAM domain of NICD or other corepressors, e.g. KYOT2  
132 and RITA<sup>17,12</sup>; however, L3MBTL3 has an atypical insertion of three threonine residues,  
133 resulting in an unusual peptide backbone conformation not seen in other BTB-binding  
134 proteins. We validate our structural findings using structure-guided mutants of RBPJ and  
135 L3MBTL3, and test these mutants using ITC and cell-based assays. We observe a high  
136 degree of correspondence between our structure and the molecular/functional  
137 consequences associated with the expression of various RBPJ/L3MBTL3 mutants in

138 mammalian cells. Moreover, to identify potential target genes regulated by RBPJ-  
139 L3MBTL3, we perform RNA-Seq on a mouse hybridoma mature T (MT) cell line, in which  
140 RBPJ has been depleted using CRISPR-Cas9 technology and replaced by a L3MBTL3-  
141 binding-deficient RBPJ mutant. We further validate these findings by shRNA mediated  
142 knockdown of L3MBTL3 in MT cells.

143

## 144 **Results**

145

### 146 **Defining the RBPJ-Interaction Domain of L3MBTL3**

147

148 We used isothermal titration calorimetry (ITC) to measure the binding constants  
149 between constructs of human L3MBTL3 and mouse RBPJ in order to map the RBPJ-  
150 interaction domain (RBP-ID) of L3MBTL3. To begin, we found that an L3MBTL3 construct  
151 (Fig 2A and Table 1), which contains its N-terminal region through the MBT domains  
152 (residues 1-523), binds RBPJ with micromolar affinity ( $K_d = 1.9 \mu\text{M}$ ). Dividing this  
153 construct into two parts – the MBT domains (198-523) were shown to have no detectable  
154 binding to RBPJ, while the N-terminus (1-197) bound with a dissociation constant of  $1.5$   
155  $\mu\text{M}$  (Table 1), suggesting that the MBT domains do not contribute to interactions with  
156 RBPJ. Circular dichroism (CD) was performed on the N-terminus construct (1-197) to  
157 identify any secondary structural elements. In agreement with *in silico* secondary  
158 structure predictions (SABLE server for example<sup>31</sup>), the CD data showed that the isolated  
159 N-terminal construct is composed of primarily random coil, with some potential  $\beta$ -sheet  
160 and very low  $\alpha$ -helix content (Fig 2B). Further dissection of the N-terminus led to  
161 characterization of L3MBTL3 (31-70) with a  $K_d$  of 450nM, which we could additionally  
162 narrow down to a 19-mer peptide (52-70) that has a comparable affinity ( $0.92 \mu\text{M } K_d$ ) (Fig  
163 2C and Table 1). Based on the crystal lattice contacts of previous RBPJ-coregulator X-  
164 ray structures<sup>18,19</sup>, we designed a 16-mer peptide (55-70) that was used for crystallization  
165 trials and bound RBPJ with a 530 nM  $K_d$  (Table 1).

166

### 167 **Crystal Structure of the RBPJ-L3MBTL3-DNA Complex**

168

169 In order to generate crystals of the complex between the structural core of RBPJ  
170 (residues 53-474) and the RBP-ID of L3MBTL3, we tested different constructs of RBPJ  
171 and different L3MBTL3 peptides, as well as different oligomeric DNA duplexes that  
172 contain a single RBPJ binding site. From our previous work demonstrating that L3MBTL3  
173 competes with NICD for RBPJ binding<sup>21</sup>, we surmised that L3MBTL3 in complex with  
174 RBPJ may crystallize in conditions similar to other coregulators that have RAM-like  
175 peptide binding motifs, e.g. FHL1 (PDB: 4J2X)<sup>19</sup> or RITA1 (PDB: 5EG6)<sup>18</sup>. However,  
176 RBPJ-L3MBTL3-DNA complexes did not crystallize under these previously identified  
177 conditions. Using a different N-terminal affinity tag (His-SMT3 rather than GST), which  
178 results in an N-terminus of RBPJ shortened by four residues following cleavage, was  
179 critical for crystallizing RBPJ-L3MBTL3-DNA complexes. Additionally, in contrast to  
180 previous RBPJ complex structures, which used an oligomeric DNA duplex that  
181 corresponds to a RBPJ binding site within the *Hes-1* promoter region<sup>13,14,16,18-20,32</sup>, we  
182 used a C→T variant of this sequence (CGTGGGAA vs TGTGGGAA) that interacts with  
183 higher affinity to RBPJ (*data not shown*). Combining these two approaches successfully

184 led to the identification of multiple crystallization conditions for the RBPJ-L3MBTL3  
185 complex bound to DNA and optimization of conditions led to large, X-ray diffraction quality  
186 crystals. Molecular replacement performed with the RBPJ-DNA complex (PDB: 3IAG)<sup>33</sup>  
187 was used to solve the initial structure, allowing L3MBTL3 to be built into the  $F_o - F_c$  map.  
188 Interestingly, the N-terminal serine residue of RBPJ forms a key crystal contact with a  
189 neighboring DNA molecule, underscoring the importance of the new RBPJ construct used  
190 for structural studies. We report the 2.06 Å resolution RBPJ-L3MBTL3-DNA structure (Fig  
191 3A) from  $P2_12_12_1$  crystals ( $a = 67.9$ ,  $b = 96.9$ ,  $c = 105.8$ ) with a single copy of each  
192 component in the asymmetric unit. The final dataset was refined to  $R_{work}$  and  $R_{free}$  values  
193 of 19.9% and 24.3%, respectively (Table 2).

194 The structure shows that consistent with our current and previous binding studies<sup>21</sup>  
195 L3MBTL3 binds entirely to the BTD of RBPJ, threading through a narrow groove and  
196 down the front face of the BTD (Fig 3A,B). L3MBTL3 residues 56-69 (-  
197 KKATATTTWVMPTA-) were built into the electron density; however, the N-terminal  
198 lysines (56-57), which contribute to binding (*see below*), have poorly resolved sidechain  
199 density (Fig 3B). L3MBTL3 residues W64 and V66 bury their sidechains into an exposed  
200 hydrophobic pocket on the surface of the BTD. The overall binding mode of L3MBTL3 is  
201 similar to other RAM-like coregulators that bind RBPJ<sup>7,12</sup>, and analysis of the side chains  
202 involved in complex formation (PDBePISA server<sup>34</sup>, shown in Fig 3B) suggests the  
203 involvement of many RBPJ residues that have been experimentally shown to impact  
204 binding by RAM and other RAM-like partners (Fig 3C)<sup>35</sup>.

205

## 206 **Comparison of RBPJ-L3MBTL3 Complex to Other Coregulators**

207

208 Structural alignment of L3MBTL3 with the RAM domain of Lin-12 and the  
209 corepressors FHL1, RITA1, and SHARP, reveals similar and unique features of L3MBTL3  
210 binding (Fig 4). On one hand, the C-terminal portion of the L3MBTL3 peptide binds RBPJ  
211 nearly identically to the other coregulators (Fig 4A), including a perfect alignment of W64  
212 (black box in Fig 4B) with the tryptophan that is conserved in RAM and other BTD-binders  
213 with the exception of SHARP, which has a serine residue at this position (Fig 4B). This  
214 buried tryptophan is part of the hydrophobic tetrapeptide motif (- $\Phi$ W $\Phi$ P-,  $\Phi$  = nonpolar  
215 residue) that has been found in many BTD-binding proteins and is critical for complex  
216 formation<sup>7,12</sup>. However, the L3MBTL3 tetrapeptide sequence is -TWMV- making it the  
217 most divergent RBPJ binding partner apart from SHARP, which in addition to the BTD  
218 also binds the CTD<sup>20</sup>. P67 (blue box Fig 4B), which resides directly after the tetrapeptide,  
219 is conserved in the RAM domains from *C. elegans* and NOTCH4, as well as RITA1 and  
220 SHARP. In L3MBTL3, this residue plays an important role in complex formation, as  
221 mutation of P67 to alanine completely abolishes L3MBTL3 binding to RBPJ (*see below*).

222 On the other hand, L3MBTL3 residues upstream of the hydrophobic tetrapeptide  
223 differ significantly from the other BTD-binders (Fig 4C). RAM, FHL1, and RITA1 form  
224  $\beta$ -sheet interactions with the BTD and then lie along a groove that runs across the front  
225 face of the BTD. The L3MBTL3 N-terminus is situated further inward before its backbone  
226 bulges out and over the BTD groove (Fig 4C-D). The extrusion is formed by three  
227 consecutive threonines (T61-T63), whereby T63 comes back into alignment with other  
228 BTD-binders at the putative start of the L3MBTL3 hydrophobic tetrapeptide (-TWMV-).  
229 Before the threonine extrusion, L3MBTL3 A60 aligns with another conserved position

230 among BTD binders (red box in Fig 4B). This position requires residues with a small  
231 sidechain due to its close contact with the BTD (Fig 4D). Thus, A60 and T63 anchor  
232 L3MBTL3 to the BTD in two places and necessitate an extrusion of a short loop by the  
233 intervening two threonine residues. As depicted in Figure 4B, compared to other BTD  
234 binders, L3MBTL3 essentially contains an extra residue that imparts this feature in the  
235 complex structure.

236 To further characterize the unusual threonine loop, we reproduced our crystals  
237 with an L3MBTL3 peptide in which T62 was deleted ( $\Delta 62$ : VKKATATTWMVPTAQ). The  
238 data quality from the L3MBTL3 mutant crystals was nearly identical to the wild-type  
239 crystals and the structures refined similarly (Table 2). With one less residue between A60  
240 and T63, the  $\Delta 62$  peptide takes on a conformation very similar to the other BTD-binders,  
241 rather than maintaining the extruded loop (Fig 4E). Notably, the N-terminus of the peptide  
242 forms a  $\beta$ -strand interaction akin to RAM, FHL1, and RITA. Moreover, the N-terminal  
243 lysine sidechains are also resolved in this structure: K56 extends out into the solvent and  
244 K57 rests on the BTD with its amino group making a likely hydrogen bonding interaction  
245 with the hydroxyl group from T262 of RBPJ, consistent with this residue providing an  
246 important contact between the proteins. Binding of the  $\Delta 62$  L3MBTL3 peptide to RBPJ  
247 ( $0.99 \mu\text{M } K_d$ ) is similar to wild-type ( $0.92 \mu\text{M } K_d$ ) (Table 3). While the functional  
248 significance of the threonine bulge requires further study, retaining an extra threonine  
249 raises the possibility of post-translational modification of L3MBTL3 for regulated binding  
250 to RBPJ, albeit to date there is no experimental evidence that any of the threonine  
251 residues are modified *in vivo*.

252

## 253 **Binding Analysis of RBPJ-L3MBTL3 Mutants**

254

255 Next, we used ITC to further understand the molecular determinants of L3MBTL3  
256 binding to RBPJ. To this end we designed a series of point mutants scanning along the  
257 L3MBTL3 52-70 peptide, starting with N54, whereby each residue was changed to an  
258 alanine, except for native alanines in L3MBTL3, which were changed to arginines (Fig  
259 5A). Overall, the results show high variability in binding with single mutations across the  
260 L3MBTL3 RBP-ID (Fig 5B and Table 3). Of the 17 mutants, nine (K56A, K57A, A60R,  
261 T61A, T63A, W64A, V66A, P67A, and A69R) reduce binding by approximately 50% or  
262 more, with T63A, W64A, V66A, and P67A completely abrogating binding. These latter  
263 residues (-**TWMVP**-) constitute the hydrophobic tetrapeptide region (- $\Phi W\Phi P$ -) with P67  
264 directly following the hydrophobic tetrapeptide, which is conserved in RITA1, SHARP, and  
265 other coregulators (Fig 4B). T63, W64, and V66 sample the hydrophobic binding pocket  
266 on the face of the BTD that is used by other corepressors, highlighting a recurring Notch  
267 coregulator binding mechanism to RBPJ. The pyrrolidine ring of P67 points away from  
268 the BTD face, but its orientation allows for hydrogen bonding and hydrophobic  
269 interactions with the backbone of RBPJ. The N-terminal lysines (K56/57) putatively  
270 interact with a negative patch on the BTD, and as mentioned above, K57 appears to have  
271 specific contacts with T262 of RBPJ while K56 points outwards to the solvent. Under more  
272 physiological ionic strength conditions, K56 is likely to sit on the BTD itself and have  
273 specific interactions as well. A60R also reduces binding by 75%, primarily due to the steric  
274 clashes caused by introduction of the large arginine sidechain where normally the methyl  
275 group of alanine points directly towards the surface of the BTD. Unexpectedly, three

276 L3MBTL3 point mutants increase binding to RBPJ by varying degrees. A58R introduces  
277 a charged residue near E260 of RBPJ, which has been demonstrated to be a mediator of  
278 salt bridge bond formation for FHL1 and RITA1<sup>18,19</sup>. The most outstanding binding  
279 increase (300 nM  $K_d$ ) is seen for T62A, which is the second residue of the three threonine  
280 extrusion in wild-type L3MBTL3 and perhaps reduces some of the backbone strain  
281 induced by the loop bulging.

282 We then measured binding of the wild-type L3MBTL3 peptide against a series of  
283 RBPJ mutants (Fig 5C and Table 4) known to affect binding of other BTB interacting  
284 partners: E260A, F261A, V263A, K275M, A284R, and Q333A<sup>35</sup>. These residues are  
285 generally surface exposed that span the path of the coregulator binding site and whose  
286 mutation doesn't alter the overall structure of the BTB. As with the L3MBTL3 point  
287 mutants, these mutants again demonstrate the remarkable sensitivity of the RBPJ-  
288 L3MBTL3 interaction at certain sites (Fig 5D). In addition to complete disruption of binding  
289 by F261A and A284V mutations, E260A (3.73  $\mu$ M), V263A (3.03  $\mu$ M), and K275M (4.15  
290  $\mu$ M) all show a modest ~3-5 fold increase in  $K_d$ , *i.e.* decrease in affinity. Q333A had a  
291 small reduction in binding (1.31  $\mu$ M), which is consistent with this residue having the most  
292 variable effect on binding of other coregulators<sup>18-20</sup>. The pattern of L3MBTL3 binding to  
293 these mutant forms of RBPJ is consistent with the other BTB-binders, although complete  
294 loss of binding by F261 or A284 is unusual<sup>7,12</sup>.

295

## 296 Cellular Analysis of the RBPJ-L3MBTL3 Complex

297

298 To validate in cells the findings from our crystal structure and ITC binding studies,  
299 we first tested the activity of L3MBTL3 mutants in coimmunoprecipitation (coIP) and  
300 mammalian two-hybrid (MTH) assays. We focused on the residues 63-67 (-TWMVP-),  
301 which encompass the hydrophobic tetrapeptide and flanking conserved regions, and had  
302 the strongest effect on binding to RBPJ in our ITC experiments. Here, we generated single  
303 alanine point mutants in full-length L3MBTL3 that correspond to those tested in an  
304 L3MBTL3 peptide ITC, as well as a 5xA mutant with all five residues mutated in tandem  
305 (TWMVP → AAAAA). Immunoprecipitation of HA-tagged L3MBTL3 variants from a U87  
306 human glioblastoma cell line (Fig 6A) shows a significant reduction in binding to  
307 endogenous RBPJ for all of the mutants except for M65A, whose partial impairment is in  
308 accord with the slight increase in  $K_d$  measured *in vitro*. As a control, the  $\Delta(1-64)$  L3MBTL3  
309 mutant was previously shown to abrogate binding to RBPJ in cells<sup>21</sup>, which we now  
310 recognize as having a truncated RBP-ID. We then moved to an established mammalian  
311 two-hybrid (M2H) assay in HeLa cells<sup>36</sup>. In this experiment, L3MBTL3 variants are fused  
312 to a Gal4 DNA-binding domain and RBPJ wild-type is fused to the VP-16 activation  
313 domain such that RBPJ-L3MBTL3 interactions lead to induction of a luciferase reporter  
314 (Fig 6B). As expected, L3MBTL3 wild-type shows a concentration dependent increase in  
315 luciferase activity. Consistent with our ITC and coIP assays, the M65A mutant has a  
316 negligible decrease in reporter activity; whereas, T63A, W64A, V66A, P67A, and 5xA  
317 mutants all severely blunt induction of the luciferase reporter. Taken together, these  
318 cellular assays support our structural and binding studies and elucidate the key residues  
319 involved in RBPJ-L3MBTL3 complex formation.

320

321 To further investigate the biological role of the RBPJ-L3MBTL3 complex in cells,  
we made use of a mature T (MT) cell line in which Notch is in the OFF state<sup>20</sup> (Fig 7). In

322 this system, CRISPR/Cas9-mediated depletion of RBPJ leads to upregulation of Notch  
323 target genes, due to derepression, and this phenotype can be efficiently rescued by  
324 reintroducing wild-type (WT) RBPJ expression<sup>20</sup> (Fig 7B). Based on the structure and  
325 binding studies of the RBPJ-L3MBTL3 complex, we generated RBPJ F261A and A284V  
326 single mutants, as well as a F261A/A284V double mutant, and expressed these proteins  
327 in MT cells depleted for RBPJ. Western blot (WB) analysis demonstrated that the RBPJ  
328 mutants were expressed at similar levels as WT RBPJ (Fig 7A). While WT RBPJ  
329 efficiently downregulates the expression of the Notch target genes *Lgmn*, *Hes1* and *Hey1*  
330 (Fig 7B and as previously described<sup>20</sup>), this was not the case for RBPJ mutants F261A,  
331 A284V, and F261A/A284V (Fig 7B), which were defective in repression, supporting our  
332 biophysical, biochemical and reporter-based data.

333 To further characterize the effects of the RBPJ-L3MBTL3 interaction on a  
334 transcriptomic level, we performed RNA-Seq analysis focusing on MT cells that express  
335 either WT RBPJ or the RBPJ double mutant F261A/A284V (Figs 7C-D, S1A-B and Tables  
336 S1-S3). The individual replicates showed good reproducibility (Fig S1A) and we were able  
337 to detect a group of genes that were significantly downregulated upon rescue with WT  
338 RBPJ (Fig 7C-D). Interestingly, the majority of these genes were not downregulated using  
339 the RBPJ F261A/A284V mutant (Fig 7C-D). To note, gene ontology (GO) analysis based  
340 on the significantly downregulated genes upon RBPJ WT rescue identified different  
341 Notch-related GO terms (Fig S1B and Table S3), and similarly, a KEGG analysis also  
342 identified the “Notch signalling pathway” (adjusted p-value = 0.002575036; mmu04330).  
343 We further validated the RNA-Seq data via qPCR focusing on the target genes *Ccdc112*,  
344 *Aig1* and *Pmm1* (Fig S1C). To further demonstrate that these genes are regulated by  
345 L3MBTL3 in MT cells, we performed L3MBTL3 shRNA knockdown (Fig S2A) and  
346 observed that genes, which are significantly downregulated upon rescue with RBPJ WT,  
347 but not with RBPJ F261A/A284V mutant, are also upregulated upon L3MBTL3  
348 knockdown (Figs 7E and S2B). Additionally, we performed RNA-Seq analysis of  
349 L3MBTL3 depleted MT cells (Figs 7F, S2C-D, and Tables S1, S4, and S5) and observed  
350 that a GSEA analysis comparing L3MBTL3-specific shRNA (L3MBTL3 KD) versus control  
351 identified for the “Notch signaling pathway” (GO:0007219) a statistically significant and  
352 concordant difference between the conditions. The positive NES (normalized enrichment  
353 score) indicates an overall induction of Notch target genes (Fig 7F and Table S4) upon  
354 loss of L3MBTL3.

355

## 356 Discussion

357

358 Canonical Notch signaling ultimately results in changes in gene expression, which  
359 is mediated through the transcription factor CSL<sup>1,2,5</sup>, RBPJ in mammals. RBPJ can  
360 function as both a transcriptional repressor or activator by forming structurally similar, but  
361 functionally distinct coregulator complexes<sup>7,12</sup>. A recurring theme in RBPJ-coregulator  
362 complexes is an ~15 residue extended peptide, which binds across the front face of the  
363 BTD of RBPJ (Fig 1B)<sup>3</sup>. As first shown in NOTCH receptors, the RAM domain forms a  
364 high affinity (~20 nM) interaction with the BTD, which is anchored by the hydrophobic  
365 tetrapeptide sequence (-ΦWΦP-, Φ = nonpolar residue) and marks the first step in  
366 formation of the Notch ternary activation complex with Mastermind<sup>14</sup>. Corepressors, such  
367 as FHL1 and RITA1, also bind to the BTD of RBPJ through RAM-like peptides<sup>18,19</sup>, which



368 contain a -ΦWΦP- motif (Fig 4B), although the affinity of these complexes can vary widely  
369 from single-digit micromolar to double-digit nanomolar  $K_d$ 's. The recent structural  
370 characterization of the corepressor SHARP revealed a variation of this theme, in which  
371 bipartite binding interactions are formed with both the BTD and CTD of RBPJ<sup>20,37</sup>. The  
372 avidity of the bipartite interaction leads to an overall affinity of ~11 nM, and in this way,  
373 SHARP sidesteps the strict sequence homology rules for the -ΦWΦP- and other RAM-  
374 like regions that bind the BTD<sup>20,37</sup>.

375 Here we report the 2.06 Å X-ray structure of the RBPJ-L3MBTL3-DNA corepressor  
376 complex (Fig 3), which demonstrates that L3MBTL3 interacts with the BTD of RBPJ  
377 similar to the RAM domain of NICD, as well as the corepressors FHL1, RITA1, and  
378 SHARP, but also displays some unique structural features (Fig 4). L3MBTL3 residue W64  
379 occupies the same conserved position within the hydrophobic tetrapeptide region of all  
380 BTD-binders except SHARP, which has a serine at this position (Fig 4B). However, in  
381 contrast to other BTD-binders, L3MBTL3 does not have a proline in the fourth position of  
382 the hydrophobic tetrapeptide, which is conserved in all BTD-binders, except SHARP, but  
383 instead buries a valine sidechain in the corresponding pocket of the BTD that is  
384 structurally similar to the isoleucine of SHARP at this position. Several other L3MBTL3  
385 residues bind RBPJ in a structurally similar manner to other coregulators, including P67,  
386 which is directly downstream of the hydrophobic tetrapeptide and is conserved in RITA1,  
387 SHARP, and some NOTCH orthologs (Fig 4B). Similarly, A60 and T63 of L3MBTL3  
388 structurally align with the corresponding residues from other BTD-binders, following the  
389 rules of having a small and branched side chain, respectively, at these positions.

390 However, unique to L3MBTL3, there are two intervening residues, T61 and T62,  
391 which have not been observed in any other RBPJ interacting coregulators (Fig 4B). This  
392 insertion forces the L3MBTL3 peptide backbone to bulge outward from the BTD as it  
393 passes over a valley between the top and front faces of the BTD (Fig 4C-D). Interestingly,  
394 when we determined the structure of the L3MBTL3 Δ62 construct bound to RBPJ, rather  
395 than maintaining this bulging conformation, L3MBTL3 Δ62 assumed a conformation more  
396 closely resembling other BTD-binders. Importantly, this triple threonine motif is highly  
397 conserved in all vertebrate L3MBTL3 orthologs, suggesting it is important for function and  
398 could potentially be phosphorylated or O-linked glycosylated; however, to date, there  
399 have been no reports of such post translational modification of these residues in  
400 L3MBTL3. Taken together, the distinctive structural features L3MBTL3 adopts when in  
401 complex with RBPJ greatly expand upon the potential sequences that could bind to RBPJ  
402 *in vivo* and may reveal possible modes of regulation via PTMs, which is an understudied  
403 area of Notch signaling<sup>38</sup>.

404 We performed a rigorous ITC binding analysis of the role that each L3MBTL3  
405 residue plays in complex formation with RBPJ, which demonstrated that the determinants  
406 of binding are spread across the RBP-ID of L3MBTL3 (Fig 5). Alanine point mutations  
407 spanning the L3MBTL3 peptide lead to decreased binding, with several mutants in the  
408 extended hydrophobic peptide region (-TWMVP-), except M65, abolishing binding  
409 completely, which we corroborated in cells (Fig 6). This is similar to other BTD-binders,  
410 demonstrating that the hydrophobic peptide anchors the interaction to RBPJ. The T62A  
411 mutation, and to a lesser extent N54A and A58R, surprisingly leads to an increase in  
412 binding by the mutant L3MBTL3 peptides. Selective pressure to retain a threonine at  
413 position 62 thus creates both the peptide bulge and weakens binding to RBPJ, which may

414 affect the competition of L3MBTL3 with other coregulators, such as NICD upon activation,  
415 or alternatively, as mentioned above is functionally important for regulation, e.g.  
416 phosphorylation.

417 To validate our findings in cells, we used an RBPJ-deficient mature T (MT) cell  
418 line<sup>20</sup> and re-expressed wild-type RBPJ or RBPJ mutants (F261A, A284V, or  
419 F261A/A284V) that severely disrupt binding to L3MBTL3 *in vitro* (Table 4 and Fig 7). In  
420 this cellular assay, WT RBPJ, but not F261A, A284V, or F261A/A284V, induced  
421 repression of the Notch target genes *Lgmn*, *Hes1*, and *Hey1* (Fig 7B). Consistent with  
422 these results, shRNA-mediated knockdown (KD) of L3MBTL3 led to a concomitant de-  
423 repression of the targets *Lgmn*, *Hes1*, and *Hey1* (Fig 7E). Taken together, these studies  
424 strongly suggest the involvement of L3MBTL3 in the repression of Notch target genes in  
425 cells, albeit we cannot wholly exclude the contributions of other corepressors that bind  
426 RBPJ, such SHARP, to the observed RBPJ-mediated repression of target genes.

427 To further characterize the function of L3MBTL3, we performed RNA-Seq on  
428 RBPJ-rescued and L3MBTL3 KD MT cells, which identified the novel targets *Ccdc12*,  
429 *Aig1*, and *Pmm1*. Interestingly, *Ccdc12* has been shown to be involved in erythroid  
430 differentiation<sup>39</sup>, which is consistent with the lethality observed in L3MBTL3 knockout  
431 mice, whereby a loss in myeloid progenitor differentiation during embryogenesis leads to  
432 death by anemia<sup>27</sup>. While this connection remains to be confirmed, this potentially  
433 expands our knowledge of L3MBTL3 function.

434 Finally, Notch transcription complexes are currently being investigated as  
435 druggable targets for the treatment of Notch driven diseases<sup>40,41</sup>. However, targeting a  
436 conserved binding pocket on the BTD of RBPJ that is used by both coactivators, such as  
437 the RAM domain of NICD, and several corepressors, such as L3MBTL3 and SHARP,  
438 raises several questions regarding the signaling outcome in cells and the overall utility of  
439 this approach<sup>12,38</sup>. Indeed, the recently reported small molecule RIN1 (RBPJ Inhibitor-1)  
440 was shown to block the interactions of both NICD and SHARP with RBPJ in cellular  
441 assays<sup>40</sup>. These confounding results underscore the importance of a detailed structural  
442 and biophysical understanding of how coregulators interact with RBPJ, and how small  
443 molecules may tip the balance between repression and activation in different cellular  
444 contexts. Certainly, the unusual peptide conformation of L3MBTL3 when bound to RBPJ  
445 may lend itself to specific inhibition by targeted small molecules; however, as the first  
446 RBPJ targeted small molecules have only recently been identified, further studies are  
447 unquestionably required.

448

#### 449 **Data availability**

450

451 The structures have been deposited in Protein Data Bank (PDB) with accession numbers  
452 7RTE and 7RTI. RNA-Seq data have been deposited at Gene Expression Omnibus  
453 (GEO) under the accession number GSE.

454

#### 455 **Funding**

456

457 This work was supported by NIH R01 CA178974 to RAK, NIH T32 ES007250 to DH, the  
458 Deutsche Forschungsgemeinschaft (DFG, German Research Foundation) - TRR81- A12  
459 and BO 1639/9-1 to TB, and the Behring-Röntgen foundation and Excellence Cluster for

460 Cardio Pulmonary System (ECCPS) in Giessen to TB. BDG is supported by a Research  
461 Grant of the University Medical Center Giessen and Marburg (UKGM) and by a Prize of  
462 the Justus Liebig University Giessen.

463

#### 464 **Acknowledgements**

465

466 We thank members of the Kovall lab for their constructive criticism and the beamline staff  
467 at LS-CAT for their technical assistance. We are grateful to P. Käse and T. Schmidt-Wöll  
468 for excellent technical assistance.

469

470 RAK, DH, BDG and TB designed experiments. DH, BDG, FF performed experiments and  
471 analyzed data. DH and ZY performed structural and biophysical studies. BDG, TF and  
472 MB performed the bioinformatic analysis. RAK and DH wrote the manuscript, and all  
473 authors edited the manuscript.

474

#### 475 **Conflict of interest**

476

477 RAK is on the scientific advisory board of Cellestia Biotech AG and has received research  
478 funding from Cellestia for unrelated projects. The remaining authors declare no conflicts  
479 of interest.

480

481

482

483

484

485

486

487

488

489

490

491

492

493

494

495

496

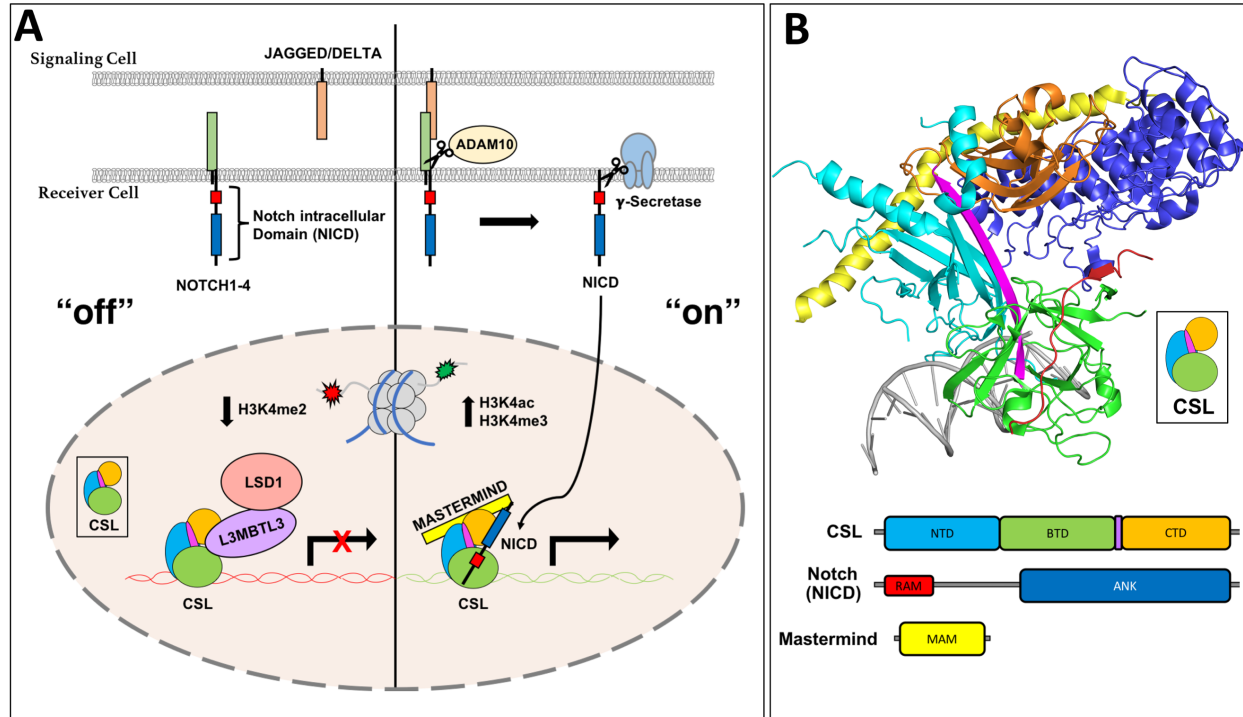

497  
 498  
 499  
 500  
 501  
 502  
 503  
 504  
 505  
 506  
 507  
 508  
 509  
 510  
 511  
 512  
 513  
 514  
 515  
 516  
 517  
 518  
 519

**Figure 1. Notch pathway fundamentals.** (A) Overview of the Notch signaling pathway. *Left, “off”*: in the absence of Notch receptor-ligand interactions, the transcription factor CSL (RBPJ in mammals) binds corepressor proteins, such as L3MBTL3, which recruits repression machinery to Notch target genes. CSL-L3MBTL3 complexes bind the demethylase LSD1 (KDM1A) leading to a decrease in H3K4me2 epigenetic marks. *Right, “on”*: when the NOTCH receptor is activated by ligand binding, a series of proteolytic events leads to the release of the Notch intracellular domain (NICD), which localizes to the nucleus and forms a ternary activation complex with CSL and Mastermind (MAM). (B) Crystal structure of the CSL-NICD-MAM ternary activation complex bound to DNA (PDBID: 2FO1). The structural core of CSL contains the N-terminal domain (NTD) in cyan,  $\beta$ -trefoil domain (BTD) in green, and C-terminal domain (CTD) in orange, which are integrated into one overall fold by a long  $\beta$ -strand, shown in magenta, that makes hydrogen bonding interactions with all three domains. The RAM (RBPJ Associated Molecule, colored red) domain of NICD forms a high affinity interaction with the BTD of CSL, which tethers the ANK (ankyrin repeats, colored blue) domain nearby. A long kinked  $\alpha$ -helix from the MAM N-terminus (yellow) can then bind the ANK-CTD interface and the NTD, locking down the ternary complex.

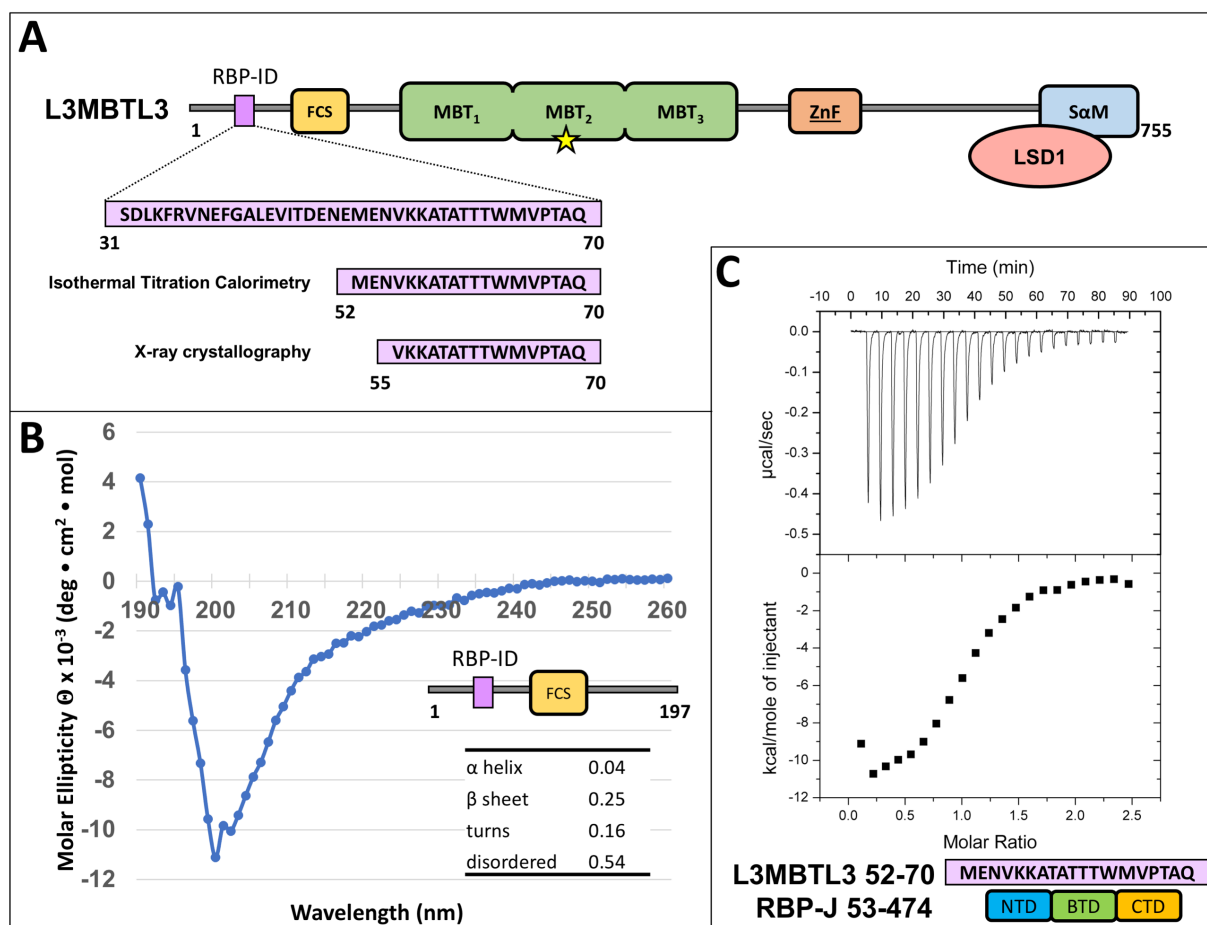

520  
521  
522  
523  
524  
525  
526  
527  
528  
529  
530  
531  
532  
533  
534  
535  
536  
537  
538  
539  
540  
541

**Figure 2. The L3MBTL3 N-terminus contains an RBP-Interaction Domain (RBP-ID).** (A) L3MBTL3 domain schematic. L3MBTL3 contains an FCS (phenylalanine-cysteine-serine) zinc finger in yellow, three MBT (malignant brain tumor) methyllysine recognition domains in green, a second canonical zinc finger in orange, and a C-terminal SAM (sterile alpha motif) domain in blue that mediates binding to LSD1/KDM1A (colored salmon). Yellow star denotes Asp 381, which is important for methyllysine binding. The N-terminal RBPJ-Interaction Domain (RBP-ID, colored purple) is ~15 residues in length with the highlighted 19-mer and 16-mer peptides that were used in the isothermal calorimetry (ITC) and X-ray crystallography experiments, respectively. (B) Far UV circular dichroism (CD) of the unbound N-terminal domain of L3MBTL3 (1-197) suggests that this region is mostly random coil with little  $\alpha$ -helical structure and modest amounts of  $\beta$ -sheet. (C) Representative ITC binding experiment of RBPJ (53-474) and L3MBTL3 (52-70) peptide shows that it is a 1:1 interaction with 0.92  $\mu$ M affinity.

542

543 **Table 1. Calorimetric binding data for L3MBTL3 constructs and native RBPJ**

| L3MBTL3 | $K$ ( $M^{-1}$ )          | $K_d$ ( $\mu M$ ) | $\Delta G^\circ$ (kcal/mol) | $\Delta H^\circ$ (kcal/mol) | $-T\Delta S^\circ$ (kcal/mol) |
|---------|---------------------------|-------------------|-----------------------------|-----------------------------|-------------------------------|
| 1-523   | $5.4 \pm 0.9 \times 10^5$ | 1.9               | $-7.7 \pm 0.2$              | $-10.6 \pm 1.6$             | $2.9 \pm 1.8$                 |
| 198-523 | NBD                       | ---               | ---                         | ---                         | ---                           |
| 1-197   | $6.6 \pm 0.3 \times 10^5$ | 1.5               | $-8.0 \pm 0.03$             | $-7.2 \pm 0.1$              | $-0.7 \pm 0.1$                |
| 31-70*  | $2.3 \pm 0.3 \times 10^6$ | 0.45              | $-8.7 \pm 0.1$              | $-7.5 \pm 0.8$              | $-1.1 \pm 0.8$                |
| 52-70   | $1.1 \pm 0.1 \times 10^6$ | 0.92              | $-8.2 \pm 0.1$              | $-13.1 \pm 0.3$             | $4.8 \pm 0.3$                 |
| 55-70   | $2.3 \pm 0.7 \times 10^6$ | 0.53              | $-8.7 \pm 0.2$              | $-8.9 \pm 1.2$              | $0.2 \pm 1.4$                 |

544 All experiments were performed at 25°C. NBD represents no binding detected. Values are the mean of at least three  
545 independent experiments and errors represent the standard deviation of multiple experiments. \*Binding data from Xu  
546 et al.<sup>21</sup>  
547  
548  
549  
550  
551  
552  
553  
554  
555  
556  
557  
558

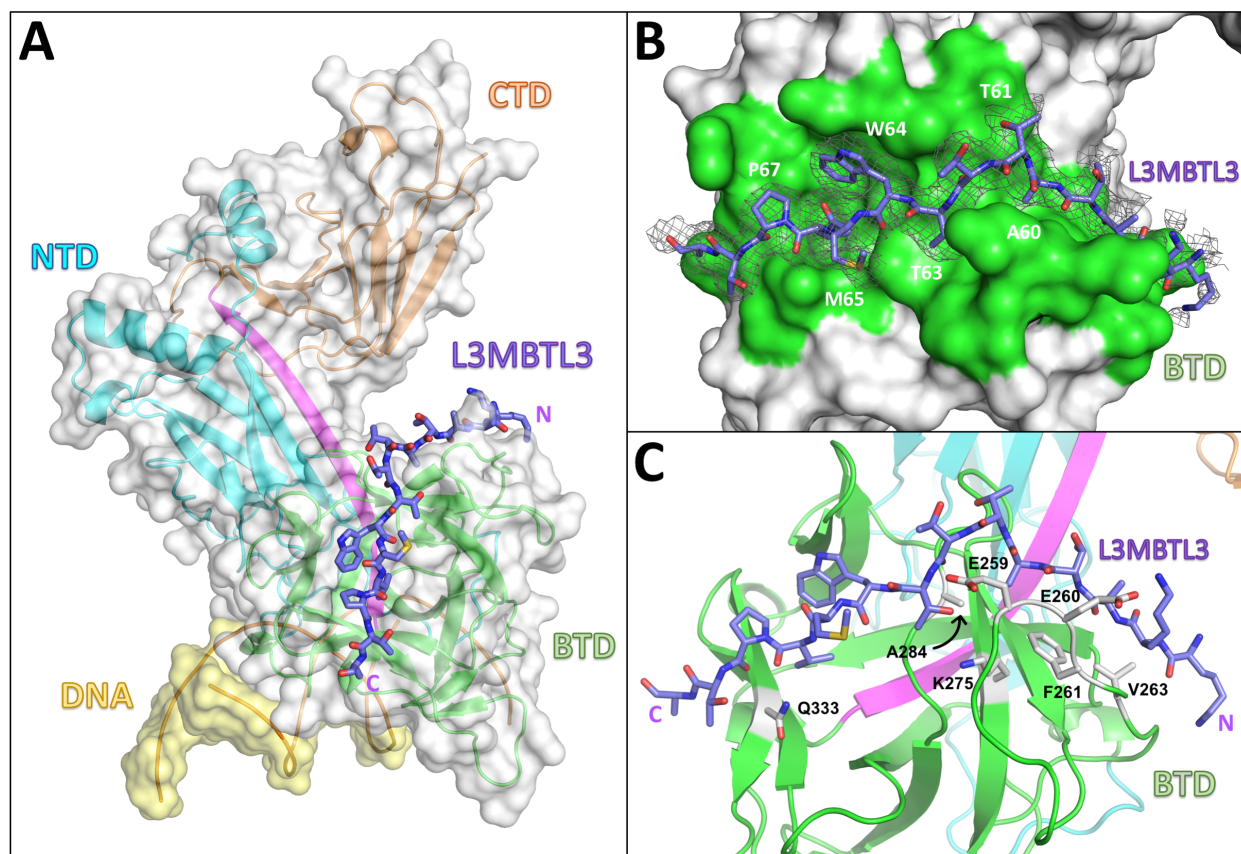

559  
560  
561  
562  
563  
564  
565  
566  
567  
568  
569  
570  
571  
572  
573  
574  
575  
576  
577  
578  
579  
580  
581  
582

**Figure 3. RBPJ-L3MBTL3-DNA Crystal Structure.** (A) The RBPJ-L3MBTL3-DNA X-ray structure with the NTD, BTD, and CTD colored cyan, green, and orange, respectively. The DNA wire model is shown in yellow. L3MBTL3 RBP-ID (55-70) represented as purple sticks binds as an elongated peptide along the top and front faces of the BTD. (B) Figure shows the L3MBTL3 binding pocket (colored green) on the BTD of RBPJ. RBPJ residues that directly contact L3MBTL3 were determined by the PISA server<sup>34</sup>. The 2F<sub>o</sub>-F<sub>c</sub> electron density map contoured at 1σ corresponds to the L3MBTL3 peptide. (C) L3MBTL3 binds residues in the BTD, depicted as grey sticks, that are important for binding RAM and other RAM-like coregulators.

583 **Table 2. X-ray Data collection and refinement statistics.**

**Data Collection Statistics**

|                       |                                               |                                               |
|-----------------------|-----------------------------------------------|-----------------------------------------------|
| Complex               | RBPJ/L3MBTL3 (55-70)/DNA                      | RBPJ/L3MBTL3 (55-70, Δ62) /DNA                |
| Resolution (Å)        | 96.93 – 2.06 (2.11 – 2.06)                    | 97.08 – 2.05 (2.12 – 2.05)                    |
| Space Group           | P2 <sub>1</sub> 2 <sub>1</sub> 2 <sub>1</sub> | P2 <sub>1</sub> 2 <sub>1</sub> 2 <sub>1</sub> |
| Wavelength (Å)        | 0.97856                                       | 0.97918                                       |
| Unit Cell a, b, c (Å) | 67.9, 96.9, 105.8                             | 67.8, 97.1, 105.5                             |
| Unit Cell α, β, γ (°) | 90.00, 90.00, 90.00                           | 90.00, 90.00, 90.00                           |
| R <sub>merge</sub>    | 0.105 (0.98)                                  | 0.092 (1.10)                                  |
| I/σI                  | 8.0 (1.5)                                     | 10.6 (2.0)                                    |
| CC <sub>1/2</sub>     | 0.98 (0.46)                                   | 0.997 (0.55)                                  |
| Completeness (%)      | 99.5 (99.7)                                   | 99.0 (99.7)                                   |
| Redundancy            | 5.6 (4.4)                                     | 6.3 (6.6)                                     |

**Refinement Statistics**

|                                          |                |                |
|------------------------------------------|----------------|----------------|
| R <sub>work</sub> /R <sub>free</sub> (%) | 19.9 / 24.3    | 19.9 / 24.3    |
| Number of reflections                    | 43,776         | 43,816         |
| Number of atoms                          | 4,164          | 4,098          |
| Complexes/asymmetric unit                | 1              | 1              |
| Wilson B/Mean B value (Å <sup>2</sup> )  | 41.14 / 49.9   | 37.35 / 44.0   |
| RMSD Bond Lengths (Å)                    | 0.008          | 0.008          |
| RMSD Bond Angles (°)                     | 1.05           | 1.05           |
| Ramachandran (favored/outliers)          | 93.29% / 2.31% | 94.43% / 2.78% |

Highest resolution shell shown in parentheses.

584  
585  
586  
587  
588  
589  
590  
591  
592  
593  
594



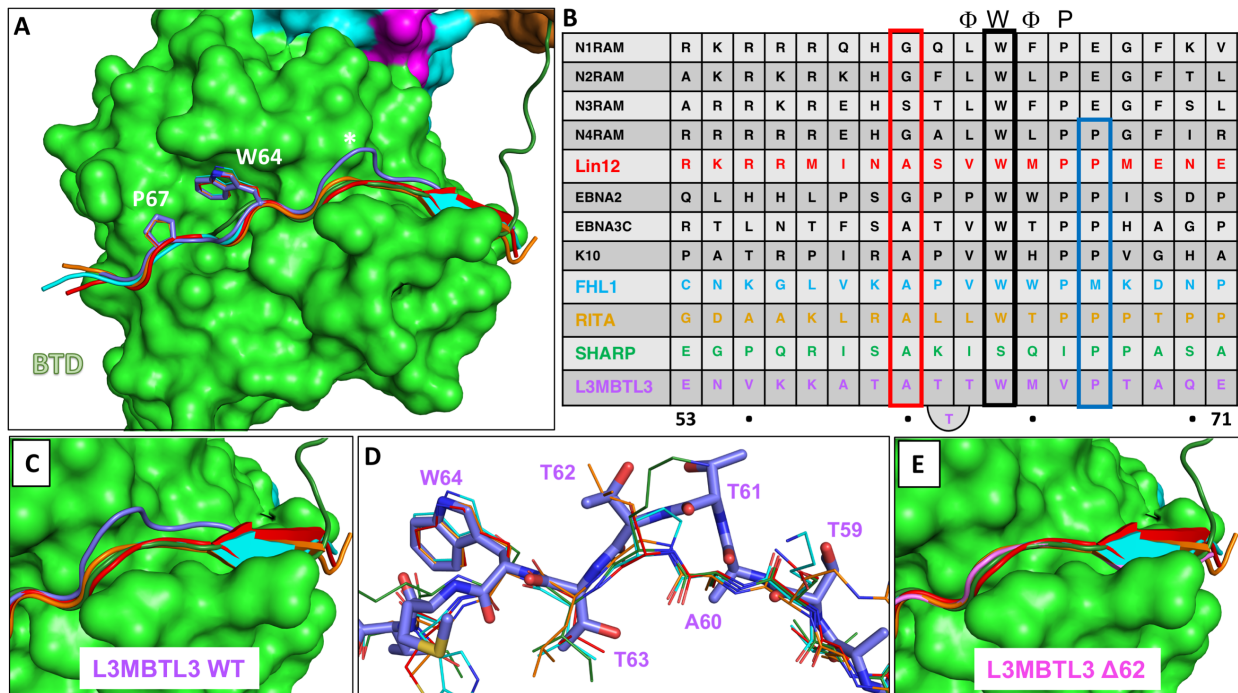

595  
596  
597  
598  
599  
600  
601  
602  
603  
604  
605  
606  
607  
608  
609  
610  
611  
612  
613  
614  
615  
616  
617  
618  
619  
620  
621  
622

**Figure 4. L3MBTL3 Adopts a Distinct Structure Among RBPJ Coregulators.** (A) Structural alignment of RAM and RAM-like peptides bound to RBPJ shows a recurrent interaction conformation. RAM from the *C. elegans* Notch ortholog Lin12 (red), FHL1 (light blue), RITA1 (orange), SHARP (dark green), and L3MBTL3 (purple) all bind to the CSL BTD (green surface) as extended peptides. Shown as sticks are L3MBTL3 residues W64 and P67, as well as the corresponding conserved residues in other coregulators. Unlike other coregulators, the backbone of L3MBTL3 (purple) diverges structurally by forming a large bulge over the cavity joining the top and front of the BTD, which is denoted with an asterisk. (B) Structure based sequence alignment of L3MTBL3 with other BTD binding proteins. The conserved tryptophan residue of the hydrophobic tetrapeptide, which has the sequence  $-\Phi W\Phi P-$  where  $\Phi$  = hydrophobic residue, is boxed in black. In contrast to other coregulators, L3MBTL3 has a valine in the fourth position of the  $-\Phi W\Phi P-$  instead of a proline, but has a proline immediately following this position (blue rectangle), which is conserved in RITA1, SHARP, and some Notch receptor orthologs. A60 aligns to the strongly conserved position, which requires small sidechain residues (red rectangle); however, this leads to L3MBTL3 having three threonine residues between the alanine and tryptophan, whereas all other coregulators only have two residues. (C) Top-down view of the RBP-ID N-terminus showing that the L3MBTL3 extrusion (purple) pushes its backbone out of alignment with respect to the other coregulators. (D) Aligned stick models of RAM-like peptides show the conserved positions of L3MBTL3 A60 and W64. T63 essentially realigns with the first hydrophobic tetrapeptide residues, forcing the T61/T62 dithreonine to create the structural bulge. (E) The crystal structure of L3MBTL3  $\Delta 62$  peptide (pink) bound to RBPJ demonstrates a complete realignment of L3MBTL3 with the other RAM-like peptides, in which L3MBTL3 adopts the  $\beta$ -strand interaction seen in RAM, FHL1, and RITA1.

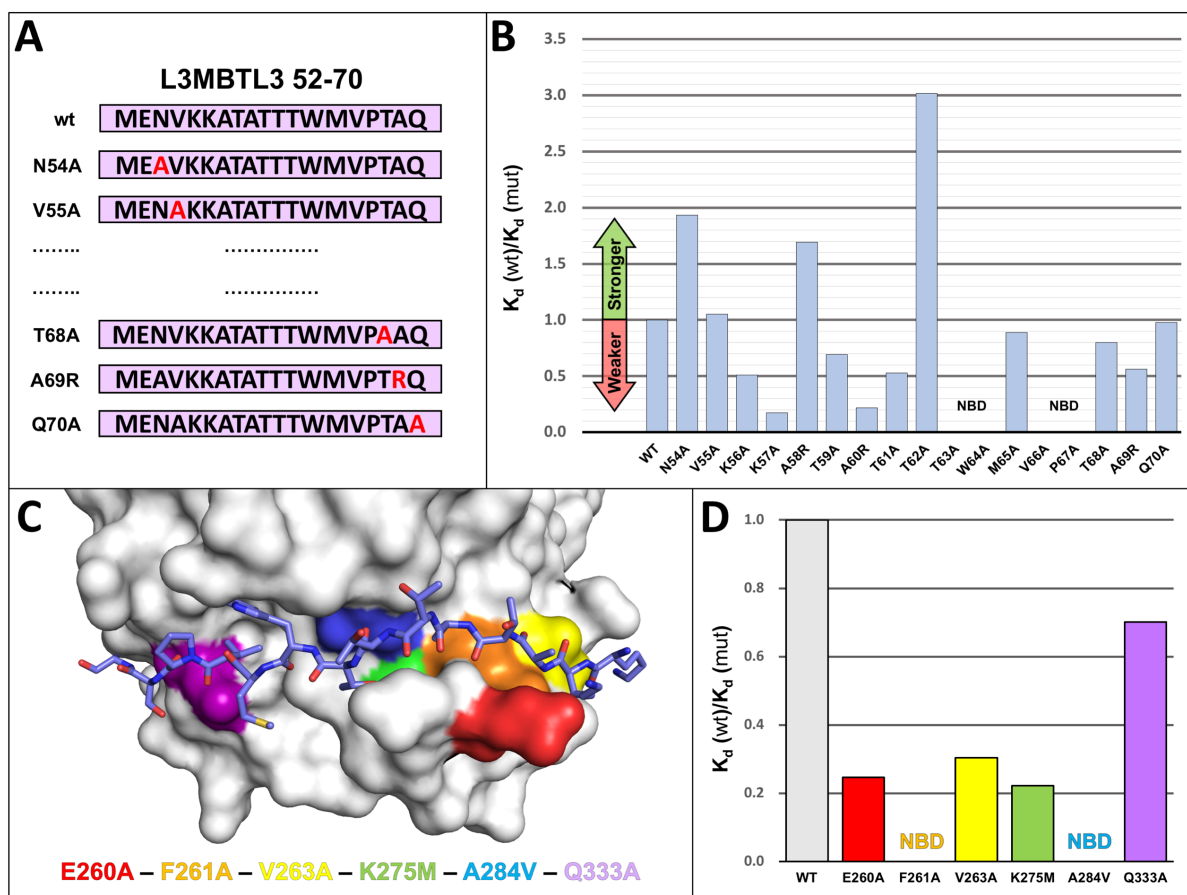

623  
624  
625  
626  
627  
628  
629  
630  
631  
632  
633  
634  
635  
636  
637  
638  
639  
640  
641  
642  
643  
644

**Figure 5. RBPJ-L3MBTL3 Binding Analysis Reveals Residues Sensitive to Mutation.** (A) Diagram of scanning point mutants of the 19-mer L3MBTL3 RBP-ID (52-70) for ITC binding studies. Starting at N54, each residue was mutated individually to an alanine, while native alanines were mutated to arginine. (B) Affinity change plot [ $K_d$  (wt)/ $K_d$  (mut)] for L3MBTL3 alanine scanning mutants tested against RBPJ wild-type (WT). Changes are plotted as the ratio of  $K_d$  values, where an increase in  $K_d$  (weaker binding) is below 1 and vice versa. Mutations along the length of the peptide have varying effects on binding, with K57A and A260R significantly affecting binding; T63A, W64A, V66A, from the hydrophobic tetrapeptide region, and the adjacent P67A mutant all completely abrogate binding. N54A, A58R, and T62A show increased binding to RBPJ, with T62A from the dithreonine loop behaving as the tightest binding peptide (~300nM  $K_d$ ). (C) Visualization of BTD residues targeted for mutation with color coding. The L3MBTL3 peptide is colored purple and shown as sticks. These BTD residues (E260, F261, V263, K275, A284, Q333) have all been shown to influence binding of other RAM-like coregulators, with F261 and A284 mutations causing the largest decreases in affinity. (D) Affinity change plot for BTD mutants tested against L3MBTL3 52-70 wild-type peptide. All mutations negatively affect binding, with Q333A having the smallest effect; F261A and A284V completely abrogate L3MBTL3 binding; and E260A, V263A, and K275M have modest effects on binding. NBD = no binding detected.

645 **Table 3. Calorimetric binding data for L3MBTL3 alanine mutants and native RBPJ**

| L3MBTL3     | $K$ ( $M^{-1}$ )           | $K_d$ ( $\mu M$ ) | $\Delta G^\circ$ (kcal/mol) | $\Delta H^\circ$ (kcal/mol) | $-T\Delta S^\circ$ (kcal/mol) | $\Delta\Delta G^\circ$ (kcal/mol) |
|-------------|----------------------------|-------------------|-----------------------------|-----------------------------|-------------------------------|-----------------------------------|
| WT          | $1.1 \pm 0.1 \times 10^6$  | 0.92              | $-8.2 \pm 0.1$              | $-13.1 \pm 0.3$             | $4.8 \pm 0.3$                 | --                                |
| WT + DMSO   | $1.1 \pm 0.1 \times 10^6$  | 0.90              | $-8.2 \pm 0.1$              | $-12.8 \pm 0.6$             | $4.5 \pm 0.7$                 | -0.02                             |
| N54A        | $2.1 \pm 0.6 \times 10^6$  | 0.47              | $-8.6 \pm 0.2$              | $-11.1 \pm 0.9$             | $2.5 \pm 1.1$                 | -0.4                              |
| V55A        | $1.1 \pm 0.2 \times 10^6$  | 0.87              | $-8.3 \pm 0.1$              | $-13.6 \pm 1.0$             | $5.3 \pm 1.1$                 | -0.02                             |
| K56A + DMSO | $5.6 \pm 1.8 \times 10^5$  | 1.8               | $-7.8 \pm 0.2$              | $-8.0 \pm 1.2$              | $0.2 \pm 1.3$                 | 0.4*                              |
| K57A        | $1.9 \pm 0.4 \times 10^5$  | 5.3               | $-7.2 \pm 0.2$              | $-11.9 \pm 0.7$             | $4.7 \pm 0.7$                 | 1.1                               |
| A58R        | $1.9 \pm 0.3 \times 10^6$  | 0.54              | $-8.6 \pm 0.1$              | $-14.0 \pm 0.9$             | $5.4 \pm 0.9$                 | -0.3                              |
| T59A        | $7.6 \pm 1.1 \times 10^5$  | 1.3               | $-8.0 \pm 0.1$              | $-9.9 \pm 0.7$              | $1.9 \pm 0.8$                 | 0.2                               |
| A60R        | $2.4 \pm 0.5 \times 10^5$  | 4.2               | $-7.3 \pm 0.1$              | $-15.7 \pm 0.3$             | $8.4 \pm 0.4$                 | 0.9                               |
| T61A        | $5.8 \pm 0.6 \times 10^5$  | 1.7               | $-7.9 \pm 0.1$              | $-11.4 \pm 0.6$             | $3.5 \pm 0.6$                 | 0.4                               |
| T62A        | $3.3 \pm 0.5 \times 10^6$  | 0.30              | $-8.9 \pm 0.1$              | $-13.7 \pm 0.3$             | $4.8 \pm 0.4$                 | -0.7                              |
| $\Delta 62$ | $1.0 \pm 0.03 \times 10^6$ | 0.99              | $-8.2 \pm 0.0$              | $-12.7 \pm 0.7$             | $4.5 \pm 0.7$                 | 0.04                              |
| T63A        | NBD                        | ---               | ---                         | ---                         | ---                           | ---                               |
| W64A        | NBD                        | ---               | ---                         | ---                         | ---                           | ---                               |
| M65A        | $1.0 \pm 0.3 \times 10^6$  | 1.0               | $-8.2 \pm 0.2$              | $-12.4 \pm 1.7$             | $4.3 \pm 1.9$                 | 0.1                               |
| V66A        | NBD                        | ---               | ---                         | ---                         | ---                           | ---                               |
| P67A        | NBD                        | ---               | ---                         | ---                         | ---                           | ---                               |
| T68A        | $8.7 \pm 1.0 \times 10^5$  | 1.2               | $-8.1 \pm 0.1$              | $-11.7 \pm 0.7$             | $3.6 \pm 0.7$                 | 0.1                               |
| A69R        | $6.1 \pm 0.7 \times 10^5$  | 1.63              | $-7.9 \pm 0.1$              | $-13.8 \pm 1.1$             | $5.9 \pm 1.2$                 | 0.3                               |
| Q70A        | $1.1 \pm 0.4 \times 10^6$  | 0.94              | $-8.2 \pm 0.3$              | $-14.2 \pm 0.3$             | $5.9 \pm 0.3$                 | 0.01                              |

646 Constructs: L3MBTL3 (52-70) and RBPJ (53-474). All experiments were performed at 25°C. NBD represents no  
 647 binding detected. Values are the mean of at least three independent experiments and errors represent the standard  
 648 deviation of multiple experiments. \*Relative to WT + DMSO value. K56A peptide required dissolution in a phosphate  
 649 buffer with 5% DMSO.

650  
 651  
 652  
 653  
 654  
 655  
 656  
 657  
 658  
 659  
 660  
 661  
 662

663  
664  
665

**Table 4. Calorimetric binding data for native L3MBTL3 and RBPJ mutants**

|             | <b>RBPJ</b> | <b><math>K</math> (<math>M^{-1}</math>)</b> | <b><math>K_d</math><br/>(<math>\mu M</math>)</b> | <b><math>\Delta G^\circ</math><br/>(<math>kcal/mol</math>)</b> | <b><math>\Delta H^\circ</math><br/>(<math>kcal/mol</math>)</b> | <b><math>-T\Delta S^\circ</math><br/>(<math>kcal/mol</math>)</b> | <b><math>\Delta\Delta G^\circ</math><br/>(<math>kcal/mol</math>)</b> |
|-------------|-------------|---------------------------------------------|--------------------------------------------------|----------------------------------------------------------------|----------------------------------------------------------------|------------------------------------------------------------------|----------------------------------------------------------------------|
|             | WT          | $1.1 \pm 0.1 \times 10^6$                   | 0.92                                             | $-8.2 \pm 0.1$                                                 | $-13.1 \pm 0.3$                                                | $4.8 \pm 0.3$                                                    | --                                                                   |
| BTD mutants | E260A       | $2.6 \pm 0.8 \times 10^5$                   | 3.8                                              | $-7.4 \pm 0.2$                                                 | $-13.6 \pm 3.4$                                                | $6.2 \pm 3.6$                                                    | 0.9                                                                  |
|             | E260K*      | $2.2 \pm 0.1 \times 10^5$                   | 4.5                                              | $-7.3 \pm 0.1$                                                 | $-16.8 \pm 0.9$                                                | $9.5 \pm 0.9$                                                    | 0.9                                                                  |
|             | F261A       | NBD                                         | ---                                              | ---                                                            | ---                                                            | ---                                                              | ---                                                                  |
|             | V263A       | $7.6 \pm 1.5 \times 10^5$                   | 1.3                                              | $-8.0 \pm 0.1$                                                 | $-10.6 \pm 1.0$                                                | $2.6 \pm 0.9$                                                    | 0.2                                                                  |
|             | K275M       | $2.4 \pm 0.6 \times 10^5$                   | 4.2                                              | $-7.3 \pm 0.1$                                                 | $-13.7 \pm 1.4$                                                | $6.4 \pm 1.5$                                                    | 0.9                                                                  |
|             | A284V       | NBD                                         | ---                                              | ---                                                            | ---                                                            | ---                                                              | ---                                                                  |
|             | Q333A       | $3.3 \pm 0.9 \times 10^5$                   | 3.0                                              | $-7.5 \pm 0.2$                                                 | $-10.3 \pm 2.1$                                                | $2.8 \pm 2.3$                                                    | 0.7                                                                  |

666 Constructs: L3MBTL3 (52-70) and RBPJ (53-474). All experiments were performed at 25°C. NBD represents no  
667 binding detected. \*N=2 replicates. Values are the mean of at least three independent experiments and errors represent  
668 the standard deviation of multiple experiments.

669  
670

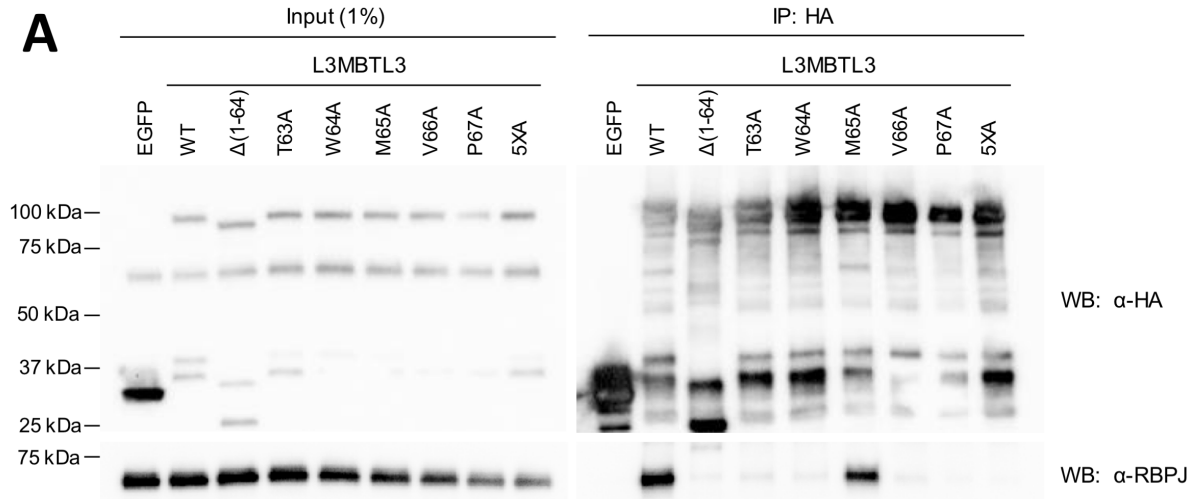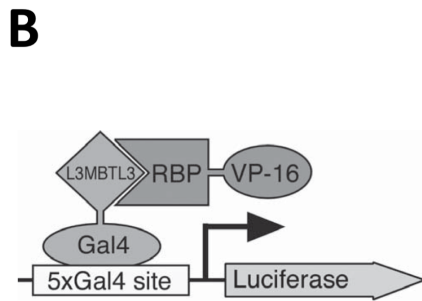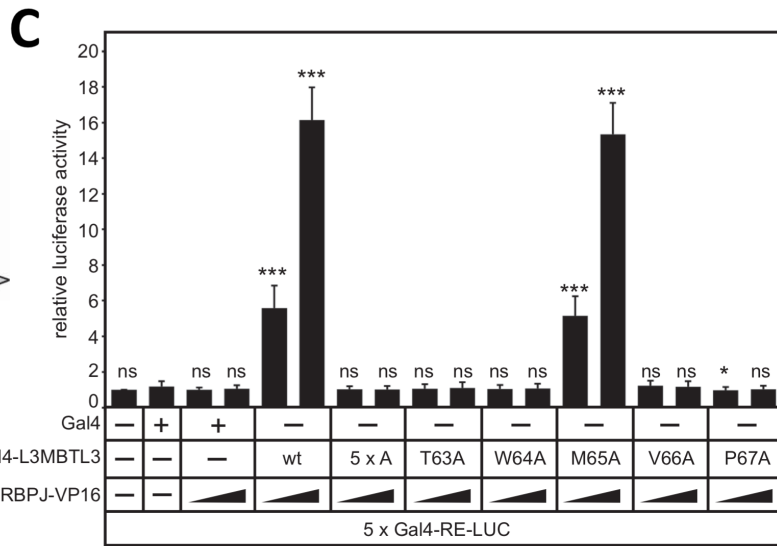

671 **Figure 6. Cellular Analysis of L3MBTL3 Mutants.** (A) Figure shows Western blot  
672 (WB) of immunoprecipitated (IP) HA-tagged L3MBTL3, wild-type (WT) and mutants,  
673 with RBPJ from U87-MG glioblastoma cells. The N-terminal deletion construct  
674 L3MBTL3 ( $\Delta$ 1-64) has previously been shown to completely abrogate interactions with  
675 RBPJ in cells<sup>21</sup>. The binding deficient L3MBTL3 point mutants identified by ITC (T63A,  
676 W64A, V66A, P67A) are similarly impaired for binding RBPJ in cells; whereas,  
677 L3MBTL3 M65A, which retains 90% of binding *in vitro*, only modestly affects  
678 interactions with RBPJ in cells. As expected, the 5x alanine mutant (5XA =  
679 T63A/W64A/M65A/V66A/P67A) completely abrogates L3MBTL3-RBPJ interactions. (B)  
680 Schematic representation of mammalian two-hybrid assay. HeLa cells were  
681 cotransfected with Gal4-L3MBTL3 wild-type and mutant constructs and increasing  
682 amounts of RBP-VP16 together with pFR-Luc containing Gal4 recognition sites  
683 (5xGal4-RE-LUC). Luciferase activity was determined from 100  $\mu$ g portions of total cell  
684 extract. Fold-activation was determined by the relative luciferase activity after  
685 cotransfection of the Gal4 construct alone. Mean values and standard deviations from  
686 four experiments are shown. (C) Gal4-L3MBTL3 and RBPJ-VP16 interact to induce  
687 luciferase expression in an RBPJ-VP16 concentration dependent manner. Luciferase  
688 expression in the mutants corroborates the binding data and coimmunoprecipitation  
689 results, with only the M65A mutant able to recruit RBPJ-V16 to activate the reporter.

**A**

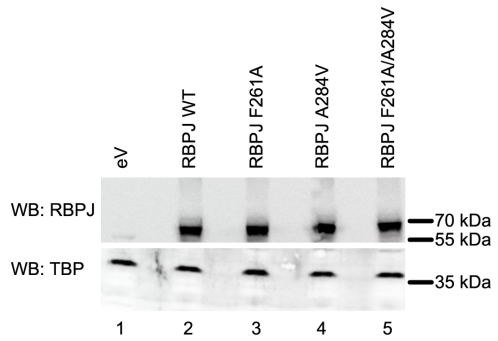

**B**

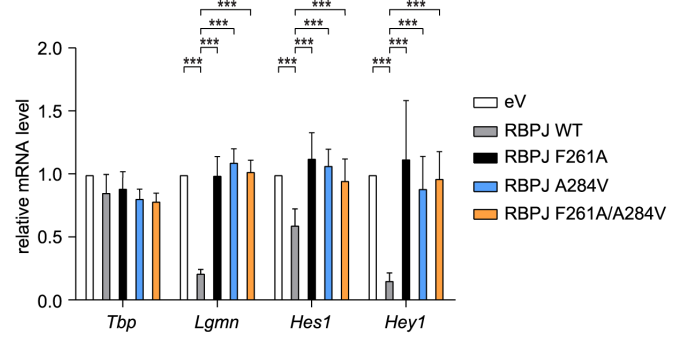

**C**

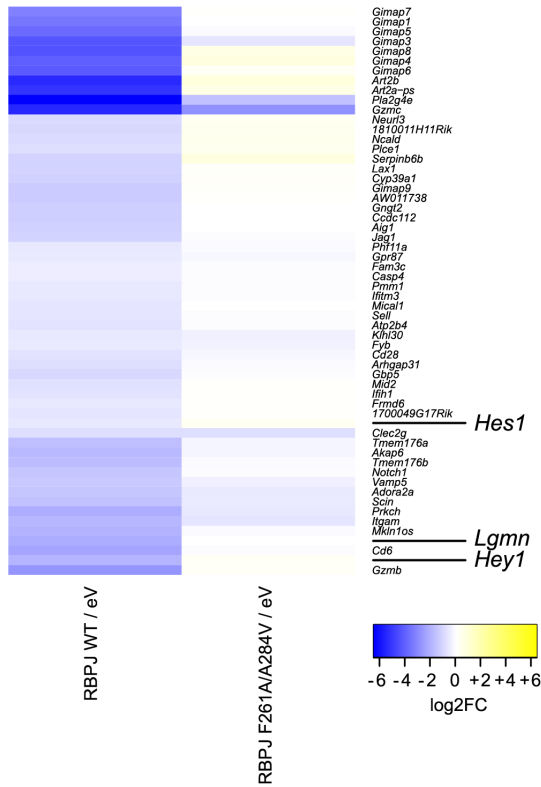

**D**

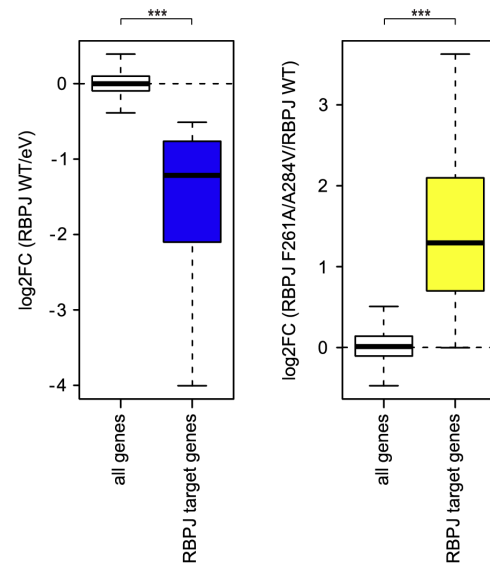

**E**

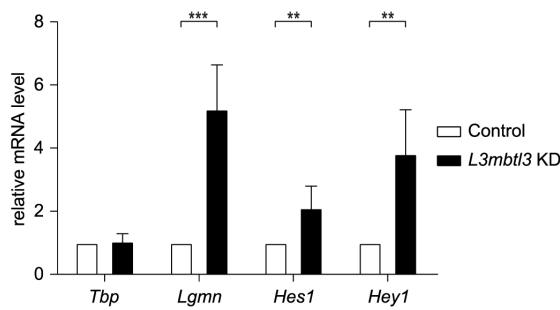

**F**

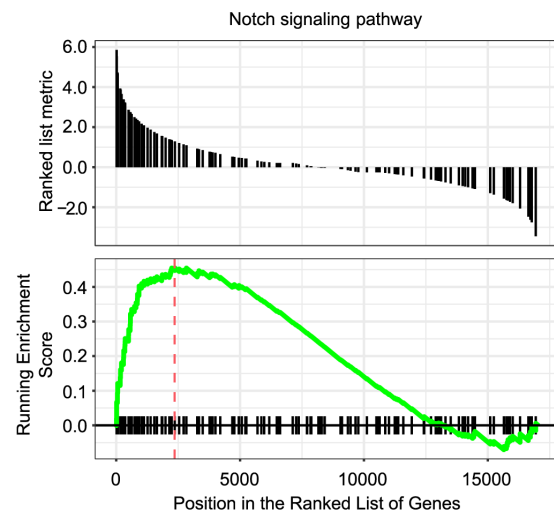

691 **Figure 7. Characterization of RBPJ/L3MBTL3 Interactions in Mature T (MT) Cells.**  
692 (A) RBPJ wild type (WT) and single or double mutants are efficiently expressed in mature  
693 T (MT) cells depleted of endogenous RBPJ. MT cells depleted of RBPJ were infected  
694 with viruses carrying plasmids encoding for RBPJ WT, F261A, A284V, F261A/A284V or  
695 empty vector (eV) as control. Nuclear extracts were analyzed by Western blotting (WB)  
696 with the indicated antibody. TBP was used as loading control. (B) Expression of Notch  
697 target genes is downregulated by RBPJ WT but not by the single or double mutants in  
698 MT cells depleted of endogenous RBPJ. MT cells depleted of RBPJ were infected with  
699 viruses carrying plasmids encoding for RBPJ WT, F261A, A284V, F261A/A284V or empty  
700 vector (eV) as control. Upon RNA extraction and reverse transcription, cDNAs were  
701 analyzed by qPCR using assays specific for *Tbp*, *Lgmn*, *Hes1* or *Hey1*. Data were  
702 normalized versus the housekeeping gene *GusB*. The mean  $\pm$  SD of seven experiments  
703 is shown (\*\* $p < 0.001$ , unpaired Student's t test). (C) Heat map visualization of log<sub>2</sub>-  
704 transformed gene expression changes of genes that are significantly downregulated  
705 (FDR  $< 0.05$  and log<sub>2</sub>FoldChange  $< - 0.5$ ) upon rescue with RBPJ WT (RBPJ WT / eV)  
706 in MT cells depleted of endogenous RBPJ (left panel). Right panel shows the expression  
707 changes of these genes upon rescue with the F261A/A284V double mutant (RBPJ  
708 F261A/A284V / eV). MT cells depleted of RBPJ were infected with viruses carrying  
709 plasmids encoding for RBPJ WT, F261A/A284V or empty vector (eV) as control. Upon  
710 RNA extraction samples were analyzed by RNA-Seq. (D) Left: Box plot representation of  
711 the log<sub>2</sub>-transformed gene expression changes (RBPJ WT / eV) from all genes and RBPJ  
712 target genes defined as those genes downregulated upon rescue with RBPJ WT. Right:  
713 log<sub>2</sub>-transformed gene expression changes of all genes (RBPJ F261A/A284V / RBPJ  
714 WT) and the RBPJ target genes (\*\* $p < 0.001$ , Wilcoxon rank sum test). (E) L3MBTL3  
715 depletion in MT cells leads to upregulation of Notch target genes. MT cells were infected  
716 with hairpin directed against L3MBTL3 or scramble (Control) as control. Upon RNA  
717 extraction and reverse transcription, cDNAs were analyzed by qPCR using assays  
718 specific for *Tbp*, *Lgmn*, *Hes1* or *Hey1*. Data were normalized versus the housekeeping  
719 gene *GusB*. Shown is the mean  $\pm$  SD of five experiments (\*\* $p < 0.01$ , \*\*\* $p < 0.001$ ,  
720 unpaired Student's t test). (F) Visualization of the gene set enrichment analysis (GSEA)  
721 comparing L3MBTL3 KD and the scramble (Control) sample indicating significant and  
722 concordant induction of genes belonging to the GO term (biological process) "Notch  
723 signaling pathway" (adjusted p-value = 0.0128).

724

## 725 **Materials and Methods**

726

### 727 **Cloning, expression, and protein purification**

728 *Mus musculus* CSL (RBPJ), residues 53-474 (structural core domain), was cloned  
729 into both the pGEX-6P-1 vector and a modified pET 28b(+) vector termed pSMT3. The  
730 former vector encodes a glutathione S-transferase (GST) fusion protein that can be  
731 removed proteolytically with Prescission Protease (GE Healthcare) after affinity  
732 purification, leaving the non-native N-terminal sequence GPLGS-. The latter encodes a  
733 fusion protein with a His-tagged SMT3 (Suppressor of Mif2 temperature-sensitive mutant  
734 3) construct, which can be cleaved with Ulp1 protease, leaving a single N-terminal serine.  
735 Expression and purification were performed as previously described<sup>14,18-20,37</sup>.  
736 Transformed bacteria were grown at 37 °C in LB medium, cooled to 10°C, then 2%

737 ethanol and 0.1mM isopropyl  $\beta$ -thiogalactopyranoside (IPTG) were added and induction  
738 allowed to occur overnight at 20°C. Bacteria were centrifuged and resuspended in either  
739 phosphate buffered saline (PBS) for GST-RBPJ or lysis buffer (20mM Tris pH 8.0, 0.5M  
740 NaCl, 50mM Imidazole) for His-SMT3-RBPJ. To purify RBPJ, bacteria were lysed by  
741 sonication, the lysate was cleared by centrifugation, and a 3M ammonium sulfate cut  
742 precipitated the majority of soluble protein. Resuspended protein was loaded onto  
743 glutathione-Sepharose resin or Ni-NTA resin and eluted with either reduced glutathione  
744 or imidazole, respectively, then the tags were proteolytically cleaved in manufacturer  
745 suggested buffers. Similarly, human L3MBTL3 fragment 1-523, 1-197, and 198-523 were  
746 cloned and purified from the pGEX-6P-1 vector. The constructs were further purified to  
747 homogeneity using ion exchange and size exclusion chromatography. L3MBTL3 peptides  
748 for ITC and crystallography were purchased as HPLC purified synthetic peptides from  
749 Peptide 2.0 and received as lyophilized powder.

750

### 751 **Circular dichroism**

752 L3MBTL3 1-197 was dialyzed into a buffer containing 50mM sodium phosphate  
753 and 150mM sodium chloride at a concentration of 1.6 mg/ml. Triplicate CD measurements  
754 were taken using an Aviv Circular Dichroism Spectrometer Model 215 at 25°C in a 0.01  
755 cm cuvette. The wavelength was scanned from 300 nm to 190 nm in 1 nm increments.  
756 CD data were processed using DICHROWEB<sup>42</sup> and reference set 7 of the CDSSTR<sup>43</sup>  
757 analysis program.

758

### 759 **Isothermal titration calorimetry**

760 ITC experiments were performed at 25°C using a Microcal VP-ITC  
761 microcalorimeter. Reaction cell and syringe samples were buffer matched in 50mM  
762 sodium phosphate pH 6.5, 150mM NaCl buffer. For the K56A L3MBTL3 mutant, the  
763 peptide was dissolved in DMSO first and diluted to 5% DMSO final concentration, while  
764 DMSO was added directly to RBPJ for the corresponding experiment. For all binding  
765 reactions, 10-15 $\mu$ M RBPJ was used in the cell and 100-150 $\mu$ M L3MBTL3 was used in the  
766 syringe. Titrations generally consisted of a single 1 $\mu$ L injection followed by 20-22 14 $\mu$ L  
767 injections. The collected data were analyzed using ORIGIN software and fit to a one site  
768 binding model.

769

### 770 **Crystallization and data collection**

771 A 15-mer DNA duplex (-TTACCGTGGGAAAGA/-AATCTTTCCACGGT-) containing a modified *Hes-1*  
772 promoter RBPJ binding site with single-strand TT/AA overhangs was generated by purifying the single  
773 stranded oligonucleotides by ion exchange chromatography and annealing in a 1:1 ratio. RBPJ purified from the pSMT3  
774 construct was incubated with the DNA duplex and human L3MBTL3 55-70 wild-type peptide in a 1:1.1:1.1  
775 ratio and screened for crystallization conditions at 4°C using both vapor diffusion and under oil  
776 crystallization methods. Vapor diffusion screening was performed in-house on an Art Robbins Phoenix  
777 Crystallization Robot. Under oil screening was outsourced to Hauptman Woodward Medical Research  
778 Institute's High Throughput Crystallization Screening Center. Several optimized conditions grew large,  
779 diffraction quality crystals with the same space group and resolution despite different morphologies.  
780 The reported structure came from a crystallization condition comprised of a 6:10 ratio of

782



783 Hampton Silver Bullet D3 (0.06 M MES monohydrate, 0.06 M PIPES, 0.33% w/v  
784 Hexamminecobalt(III) chloride, 0.02 M HEPES sodium pH 6.8) and 0.1M HEPES pH 6.8,  
785 30% PEG 3350. L3MBTL3  $\Delta$ 62 crystals were grown in 0.2M ammonium fluoride and 20%  
786 PEG 3350. All crystals were cryoprotected with 20% xylitol and flash frozen in liquid  
787 nitrogen. Remote data collection occurred at the LS-CAT and NE-CAT beamlines of  
788 Advanced Photon Source at Argonne National Lab. Both crystals belong to the  
789 orthorhombic P2<sub>1</sub>2<sub>1</sub>2<sub>1</sub> space group and diffract to under 2.1Å with unit cell dimensions:  
790 67.8Å, 97.1Å, 105.5Å for L3MBTL3 wild-type and 67.9Å, 96.9Å, 105.8Å for L3MBTL3  
791  $\Delta$ 62.

792

### 793 **Structure determination, model building, and refinement**

794 Diffraction data was processed and scaled using Mosflm<sup>44</sup> and CCP4i<sup>45</sup>. Phaser<sup>46</sup>  
795 was used to solve the structure via molecular replacement with the RBPJ-DNA complex  
796 (PDB: 3IAG)<sup>33</sup> as a search model. Coot<sup>47</sup> was used to iteratively build the L3MBTL3  
797 peptide into the model. Refinement was performed using translation/libration/screw  
798 parameters in the refine function of Phenix software<sup>48</sup>. Structure validation was performed  
799 with Molprobity<sup>49</sup>. The final model contained RBPJ residues 53-473 as well as the residual  
800 N-terminal serine. The model also contained L3MBTL3 residues 56-69, leaving off one  
801 terminal residue from each end of the peptide. The full DNA duplex is modeled. The  
802 structure was refined to R<sub>work</sub> = 19.9 and R<sub>free</sub> = 24.3. The PDBePISA server  
803 (<http://www.ebi.ac.uk/pdbe/pisa/>)<sup>34</sup> was used to calculate the L3MBTL3 binding pocket on  
804 RBPJ. Finally, PyMOL (The PyMOL Molecular Graphics System, Version 2.0  
805 Schrödinger, LLC) was used to present structural images and alignments.

806

### 807 **Cell culture, transfection and infection**

808 The mouse hybridoma mature T cell line (MT) was previously described<sup>50,51</sup> and  
809 cultivated in Iscove's Modified Dulbecco Medium (IMDM, Gibco 21980-065)  
810 supplemented with 2 % FCS, 0.3 mg/l peptone, 5 mg/l insulin, nonessential amino acids  
811 and penicillin/streptomycin. The MT cells depleted of RBPJ making use of the  
812 CRISPR/Cas9 technology were previously described<sup>20</sup>. 293T and Phoenix<sup>TM</sup> packaging  
813 cells (Orbigen, Inc., San Diego, CA, USA) were cultivated in Dulbecco's modified eagle  
814 medium (DMEM, Gibco 61965-059) supplemented with 10% FCS and  
815 penicillin/streptomycin. Cells were grown at 37°C with 5% CO<sub>2</sub>. Transfection of Phoenix<sup>TM</sup>  
816 cells and retroviral infection of MT cells were performed as previously described<sup>52</sup>.  
817 Transfection of 293T cells, lentiviral infection and selection of MT cells were performed  
818 as previously described<sup>53</sup>. U87-MG cells were cultivated in DMEM medium supplemented  
819 with 10% FBS and penicillin/streptomycin as previously described<sup>21</sup>.

820

### 821 **Constructs**

822 The pcDNA3.1 Flag-mRBPJ WT CRISPR/Cas9 resistant (CRr), the pMY-Bio IRES  
823 Blastidicin, the pMY-Bio-Flag-mRBPJ WT CRr IRES Blastidicin and the pMY-Bio-Flag-  
824 mRBPJ F261A CRr IRES Blastidicin were previously described<sup>20</sup>. The pcDNA3.1 Flag-  
825 mRBPJ A284V CRr and the pcDNA3.1 Flag-mRBPJ F261A/A284V CRr were generated  
826 via site directed mutagenesis using the QuikChange II XL Site-Directed Mutagenesis Kit  
827 (Agilent Technologies 200521-5) accordingly to manufacturer's instructions with the  
828 oligos listed in Table S6 and using the pcDNA3.1 Flag-mRBPJ WT CRr and the pcDNA3.1

829 Flag-mRBPJ A284V CRr as templates, respectively. The pMY-Bio-Flag-mRBPJ A284V  
830 CRr IRES Blastocidin and the pMY-Bio-Flag-mRBPJ F261A/A284V CRr IRES Blastocidin  
831 were generated via restriction digestion. Briefly, the pcDNA3.1 Flag-mRBPJ A284V CRr  
832 and the pcDNA3.1 Flag-mRBPJ F261A/A284V CRr were digested with NotI (NEB) and  
833 the cDNAs were inserted into the pMY-Bio IRES Blastocidin pre-digested with NotI (NEB).  
834 The reporter construct 5 x Gal4-RE-LUC (pFR-Luc) was described previously<sup>36</sup>. The Gal4  
835 expression vector pFA-CMV (Agilent/Stratagene) was used as control and as cloning  
836 vector for the Gal4-L3MBTL3 fusions. PCR fragments were digested with *EcoRI* and  
837 *HinDIII* and inserted into the corresponding sites of pFa-CMV, resulting in the Gal4-  
838 L3MBTL3 (1-197) fusion constructs (wt, T63A, W64A, M65A, V66A, P67A and 5xA). The  
839 pcDNA3-HA-tagged-L3MBTL3 expression vector was described previously<sup>21</sup> and site-  
840 directed mutagenesis was used to create L3MBTL3 mutants. All oligonucleotides used in  
841 this study are listed in Table S6. All plasmids were analyzed by sanger sequencing.

842

### 843 **ShRNA knockdown**

844 For the knockdown in MT cells, the pLKO.1 TRC1 shRNA library (SIGMA-  
845 ALDRICH) was used. Sequence of the hairpin is indicated in Table S6.

846

### 847 **RNA extraction, RT-PCR and qPCR from cell lines**

848 Total RNA was purified using Trizol reagent (Ambion 15596018) accordingly to  
849 manufacturer's instructions and 1 µg of RNA was reverse-transcribed into cDNA using M-  
850 MuLV reverse transcriptase (New England Biolabs) and random hexamers. qPCRs were  
851 performed using gene-specific oligonucleotides, double-dye probes (see Table S6),  
852 Absolute QPCR ROX Mix (Thermo Scientific AB-1139), and analyzed using the  
853 StepOnePlus™ Real-Time PCR System (Applied Biosystem). Data were normalized to  
854 the housekeeping gene *Glucuronidase β* (GusB). Alternatively, RNA was purified using  
855 the RNeasy Mini Kit (Qiagen #74104), the QIAshredder (Qiagen #79654) and treatment  
856 with DNase I (Qiagen #79254) accordingly to manufacturer's instructions.

857

### 858 **Protein extract, CoIP, cell fractionation and Western blotting**

859 Whole Cell Extract (WCE) from MT cells was prepared as follows. Briefly, cells  
860 were washed twice in PBS, lysed in WCE buffer (20 mM Tris-HCl pH 8.0, 150 mM NaCl,  
861 1 % NP-40, 10 % glycerol, 0.5 mM Na<sub>3</sub>VO<sub>4</sub>, 10 mM NaF, 1 mM PMSF, 1x protease  
862 inhibitor cocktail mix) and incubated 20 min on ice. Samples were centrifuged 15 min at  
863 13200 rpm at 4°C and protein concentration measured by Bradford assay (Sigma-  
864 Aldrich).

865 The nuclear extract of MT cells was prepared as follows. Briefly, cells were washed  
866 twice with PBS, resuspended in Hypotonic buffer (20 mM Hepes, 20 mM NaCl, 10 %  
867 glycerol, 5 mM MgCl<sub>2</sub>, 0.2 mM PMSF) and incubated 20 min on ice. Cell suspensions  
868 were vortexed and lysates were centrifuged at 4000 rpm 10 min at 4°C. After collecting  
869 the supernatant (cytoplasm), the pellets (nuclei) were washed with PBS and lysed in  
870 Hypertonic buffer 300 mM NaCl (20 mM Hepes pH 7.9, 300 mM NaCl, 0.3 % NP-40, 25  
871 % glycerol, 1 mM MgCl<sub>2</sub>, 0.2 mM PMSF, 1x protease inhibitor cocktail mix, 0.3 mM DTT).  
872 Samples were incubated 20 min on ice in cold room, centrifuged at 13000 rpm 5 min at  
873 4°C and protein concentration was measured by Bradford assay. Proteins were separated  
874 by SDS-PAGE and transferred to a nitrocellulose membrane (Amersham 10600006)

875 using the Biorad Mini Trans-Blot system. The RBPJ (Cosmo Bio Co., Clone T6709) and  
876 TBP (Santa Cruz sc-273) Western blotting were performed essentially as previously  
877 described<sup>54</sup>. In the case of the L3MBTL3 (Bethyl A302-852A) Western blotting,  
878 membranes were incubated 1 h at room temperature in blocking solution (5 % nonfat dry  
879 milk, 1x TBS, 0.1 % Tween 20) and incubated over night with primary antibody diluted  
880 1:5000 in blocking solution. Membranes were washed five times in 1x TBS, 0.1 % Tween  
881 20 and incubated 1 h at room temperature with the proper secondary antibody diluted  
882 1:5000 in blocking solution. Membranes were washed five times in 1x TBS, 0.1 % Tween  
883 20. All membranes were incubated at room temperature with ECL solution and signals  
884 were acquired with a Vilber Fusion FX7 system. The following secondary antibody were  
885 used: anti-rat IgG HRP (Jackson ImmunoResearch, 112-035-072) and anti-rabbit IgG  
886 HRP (Cell Signaling #7074S).

887

### 888 **Mammalian Two Hybrid Luciferase assay**

889 HeLa cells were seeded in 48-well plates at a density of  $20 \times 10^4$  cells. Transfection  
890 of the reporter construct pFR-Luc (5 x Gal4-RE-LUC) together with Gal4 or Gal4-  
891 L3MBTL3 expression constructs was performed with Lipofectamine 2000 reagent  
892 (Thermo Fisher Scientific) using 250 ng of reporter plasmid alone or together with  
893 increasing amounts of expression plasmid (50 ng, 100 ng). After 24 hours luciferase  
894 activity was determined from at least four independent experiments from 20  $\mu$ l of cleared  
895 lysate. Measurements were performed using a LB 9501 luminometer (Berthold) and the  
896 luciferase assay system from Promega.

897

### 898 **RNA-seq data analysis**

899 The systemPipeR R/BioC package with customized parameter files was used to  
900 generate system calls within R<sup>55</sup>. Raw sequencing reads were aligned to the mouse  
901 genome (mm9) and the corresponding GTF file (downloaded from Illumina's IGenomes  
902 site) using TopHat v.2.1.1 with parameters  $i = 30$ ,  $l = 3000$  and  $g = 1$  and alignments were  
903 stored as BAM files<sup>54</sup>. These BAM files and the gene annotation were used to calculate  
904 the gene-specific count tables for all samples with the summarizeOverlaps function<sup>56</sup>. The  
905 normalization (including batch effects) of resulting count tables per gene and subsequent  
906 detection of deregulated genes was done using DESeq2 v.1.24.0 with default settings<sup>57</sup>.  
907 Pearson correlation coefficient (PCC) was calculated based on the significantly  
908 deregulated genes (for RBPJ rescue: False discovery rate  $< 0.05$  and  $\log_2$ FoldChange  $<$   
909  $-0.5$  or  $> 0.5$ ; for L3MBTL3 KD: False discovery rate  $< 0.05$  and  $\log_2$ FoldChange  $<$   $-1$  or  
910  $> 1$ ). RBPJ target genes were chosen as those genes, which were significantly  
911 downregulated upon rescue with RBPJ WT compared to the eV control. GO, GSEA, and  
912 KEGG analysis were done within R using clusterProfiler<sup>58</sup> with standard parameters and  
913 adjusted p-values cutoffs of 0.1 (L3MBTL3 KD) or 0.01 (L3MBTL3 rescue). Genes were  
914 ranked based on the Wald test statistic resulting from DESeq2 analysis (see above). The  
915 universe for this analysis was defined as all genes that have detectable read counts in at  
916 least one sample. Analysis code is available upon request.

917

918

919

920

## 921 References

- 922
- 923 1 Siebel, C. & Lendahl, U. Notch Signaling in Development, Tissue Homeostasis, and  
924 Disease. *Physiological reviews* **97**, 1235-1294, doi:10.1152/physrev.00005.2017 (2017).
- 925 2 Bray, S. J. Notch signalling in context. *Nat Rev Mol Cell Biol* **17**, 722-735,  
926 doi:10.1038/nrm.2016.94 (2016).
- 927 3 Ntziachristos, P., Lim, J. S., Sage, J. & Aifantis, I. From fly wings to targeted cancer  
928 therapies: a centennial for notch signaling. *Cancer cell* **25**, 318-334,  
929 doi:10.1016/j.ccr.2014.02.018 (2014).
- 930 4 Majumder, S. *et al.* Targeting Notch in oncology: the path forward. *Nat Rev Drug*  
931 *Discov*, doi:10.1038/s41573-020-00091-3 (2020).
- 932 5 Kovall, R. A., Gebelein, B., Sprinzak, D. & Kopan, R. The Canonical Notch Signaling  
933 Pathway: Structural and Biochemical Insights into Shape, Sugar, and Force. *Dev Cell* **41**,  
934 228-241, doi:10.1016/j.devcel.2017.04.001 (2017).
- 935 6 Musse, A. A., Meloty-Kapella, L. & Weinmaster, G. Notch ligand endocytosis:  
936 mechanistic basis of signaling activity. *Semin Cell Dev Biol* **23**, 429-436,  
937 doi:10.1016/j.semdb.2012.01.011 (2012).
- 938 7 Oswald, F. & Kovall, R. A. CSL-Associated Corepressor and Coactivator Complexes.  
939 *Adv Exp Med Biol* **1066**, 279-295, doi:10.1007/978-3-319-89512-3\_14 (2018).
- 940 8 Fryer, C. J., White, J. B. & Jones, K. A. Mastermind recruits CycC:CDK8 to  
941 phosphorylate the Notch ICD and coordinate activation with turnover. *Mol Cell* **16**, 509-  
942 520, doi:10.1016/j.molcel.2004.10.014 (2004).
- 943 9 Oswald, F. *et al.* p300 acts as a transcriptional coactivator for mammalian Notch-1. *Mol*  
944 *Cell Biol* **21**, 7761-7774, doi:10.1128/mcb.21.22.7761-7774.2001 (2001).
- 945 10 Thompson, B. J. *et al.* The SCFFBW7 ubiquitin ligase complex as a tumor suppressor in  
946 T cell leukemia. *The Journal of experimental medicine* **204**, 1825-1835,  
947 doi:10.1084/jem.20070872 (2007).
- 948 11 O'Neil, J. *et al.* FBW7 mutations in leukemic cells mediate NOTCH pathway activation  
949 and resistance to gamma-secretase inhibitors. *The Journal of experimental medicine* **204**,  
950 1813-1824, doi:jem.20070876 [pii]  
951 10.1084/jem.20070876 (2007).
- 952 12 Hall, D. P. & Kovall, R. A. Structurally conserved binding motifs of transcriptional  
953 regulators to notch nuclear effector CSL. *Exp Biol Med (Maywood)*, 1535370219877818,  
954 doi:10.1177/1535370219877818 (2019).
- 955 13 Kovall, R. A. & Hendrickson, W. A. Crystal structure of the nuclear effector of Notch  
956 signaling, CSL, bound to DNA. *EMBO J* **23**, 3441-3451, doi:10.1038/sj.emboj.7600349  
957 (2004).
- 958 14 Friedmann, D. R., Wilson, J. J. & Kovall, R. A. RAM-induced allostery facilitates  
959 assembly of a notch pathway active transcription complex. *J Biol Chem* **283**, 14781-  
960 14791, doi:M709501200 [pii]  
961 10.1074/jbc.M709501200 (2008).
- 962 15 Lubman, O. Y., Ilagan, M. X., Kopan, R. & Barrick, D. Quantitative dissection of the  
963 Notch:CSL interaction: insights into the Notch-mediated transcriptional switch. *J Mol*  
964 *Biol* **365**, 577-589, doi:10.1016/j.jmb.2006.09.071 (2007).
- 965 16 Wilson, J. J. & Kovall, R. A. Crystal structure of the CSL-Notch-Mastermind ternary  
966 complex bound to DNA. *Cell* **124**, 985-996, doi:10.1016/j.cell.2006.01.035 (2006).

- 967 17 Nam, Y., Sliz, P., Song, L., Aster, J. C. & Blacklow, S. C. Structural basis for  
968 cooperativity in recruitment of MAML coactivators to Notch transcription complexes.  
969 *Cell* **124**, 973-983, doi:10.1016/j.cell.2005.12.037 (2006).
- 970 18 Collins, K. J., Yuan, Z. & Kovall, R. A. Structure and function of the CSL-KyoT2  
971 corepressor complex: a negative regulator of Notch signaling. *Structure* **22**, 70-81,  
972 doi:10.1016/j.str.2013.10.010 (2014).
- 973 19 Tabaja, N., Yuan, Z., Oswald, F. & Kovall, R. A. Structure-function analysis of RBP-J-  
974 interacting and tubulin-associated (RITA) reveals regions critical for repression of Notch  
975 target genes. *J Biol Chem* **292**, 10549-10563, doi:10.1074/jbc.M117.791707 (2017).
- 976 20 Yuan, Z. *et al.* Structural and Functional Studies of the RBPJ-SHARP Complex Reveal a  
977 Conserved Corepressor Binding Site. *Cell reports* **26**, 845-854 e846,  
978 doi:10.1016/j.celrep.2018.12.097 (2019).
- 979 21 Xu, T. *et al.* RBPJ/CBF1 interacts with L3MBTL3/MBT1 to promote repression of  
980 Notch signaling via histone demethylase KDM1A/LSD1. *EMBO J* **36**, 3232-3249,  
981 doi:10.15252/embj.201796525 (2017).
- 982 22 Bonasio, R., Lecona, E. & Reinberg, D. MBT domain proteins in development and  
983 disease. *Semin Cell Dev Biol* **21**, 221-230, doi:10.1016/j.semcdb.2009.09.010 (2010).
- 984 23 Nady, N. *et al.* Histone recognition by human malignant brain tumor domains. *J Mol Biol*  
985 **423**, 702-718, doi:10.1016/j.jmb.2012.08.022 (2012).
- 986 24 Vidal, M. & Starowicz, K. Polycomb complexes PRC1 and their function in  
987 hematopoiesis. *Exp Hematol* **48**, 12-31, doi:10.1016/j.exphem.2016.12.006 (2017).
- 988 25 Leng, F. *et al.* Methylated DNMT1 and E2F1 are targeted for proteolysis by L3MBTL3  
989 and CRL4(DCAF5) ubiquitin ligase. *Nature communications* **9**, 1641,  
990 doi:10.1038/s41467-018-04019-9 (2018).
- 991 26 West, L. E. *et al.* The MBT repeats of L3MBTL1 link SET8-mediated p53 methylation at  
992 lysine 382 to target gene repression. *J Biol Chem* **285**, 37725-37732,  
993 doi:10.1074/jbc.M110.139527 (2010).
- 994 27 Arai, S. & Miyazaki, T. Impaired maturation of myeloid progenitors in mice lacking  
995 novel Polycomb group protein MBT-1. *EMBO J* **24**, 1863-1873,  
996 doi:10.1038/sj.emboj.7600654 (2005).
- 997 28 James, L. I. *et al.* Small-molecule ligands of methyl-lysine binding proteins: optimization  
998 of selectivity for L3MBTL3. *J Med Chem* **56**, 7358-7371, doi:10.1021/jm400919p  
999 (2013).
- 1000 29 James, L. I. *et al.* Discovery of a chemical probe for the L3MBTL3 methyllysine reader  
1001 domain. *Nature chemical biology* **9**, 184-191, doi:10.1038/nchembio.1157 (2013).
- 1002 30 Knight, M. J., Leettola, C., Gingery, M., Li, H. & Bowie, J. U. A human sterile alpha  
1003 motif domain polymerizome. *Protein Sci* **20**, 1697-1706, doi:10.1002/pro.703 (2011).
- 1004 31 Adamczak, R., Porollo, A. & Meller, J. Combining prediction of secondary structure and  
1005 solvent accessibility in proteins. *Proteins* **59**, 467-475 (2005).
- 1006 32 Yuan, Z. *et al.* Structure and Function of the Su(H)-Hairless Repressor Complex, the  
1007 Major Antagonist of Notch Signaling in *Drosophila melanogaster*. *PLoS Biol* **14**,  
1008 e1002509, doi:10.1371/journal.pbio.1002509 (2016).
- 1009 33 Friedmann, D. R. & Kovall, R. A. Thermodynamic and structural insights into CSL-DNA  
1010 complexes. *Protein Sci* **19**, 34-46, doi:10.1002/pro.280 (2010).
- 1011 34 Krissinel, E. & Henrick, K. Inference of macromolecular assemblies from crystalline  
1012 state. *J Mol Biol* **372**, 774-797 (2007).

- 1013 35 Yuan, Z., Friedmann, D. R., VanderWielen, B. D., Collins, K. J. & Kovall, R. A.  
1014 Characterization of CSL (CBF-1, Su(H), Lag-1) mutants reveals differences in signaling  
1015 mediated by Notch1 and Notch2. *J Biol Chem* **287**, 34904-34916, doi:M112.403287 [pii]  
1016 10.1074/jbc.M112.403287 (2012).
- 1017 36 Oswald, F. *et al.* SHARP is a novel component of the Notch/RBP-Jkappa signalling  
1018 pathway. *Embo J* **21**, 5417-5426 (2002).
- 1019 37 VanderWielen, B. D., Yuan, Z., Friedmann, D. R. & Kovall, R. A. Transcriptional  
1020 repression in the Notch pathway: thermodynamic characterization of CSL-MINT (Msx2-  
1021 interacting nuclear target protein) complexes. *J Biol Chem* **286**, 14892-14902,  
1022 doi:10.1074/jbc.M110.181156 (2011).
- 1023 38 Antfolk, D., Antila, C., Kemppainen, K., Landor, S. K. & Sahlgren, C. Decoding the  
1024 PTM-switchboard of Notch. *Biochim Biophys Acta Mol Cell Res* **1866**, 118507,  
1025 doi:10.1016/j.bbamcr.2019.07.002 (2019).
- 1026 39 Fan, C. *et al.* Isolation of siRNA target by biotinylated siRNA reveals that human  
1027 CCDC12 promotes early erythroid differentiation. *Leuk Res* **36**, 779-783,  
1028 doi:10.1016/j.leukres.2011.12.017 (2012).
- 1029 40 Hurtado, C. *et al.* Disruption of NOTCH signaling by a small molecule inhibitor of the  
1030 transcription factor RBPJ. *Scientific reports* **9**, 10811, doi:10.1038/s41598-019-46948-5  
1031 (2019).
- 1032 41 Astudillo, L. *et al.* The Small Molecule IMR-1 Inhibits the Notch Transcriptional  
1033 Activation Complex to Suppress Tumorigenesis. *Cancer Res* **76**, 3593-3603,  
1034 doi:10.1158/0008-5472.CAN-16-0061 (2016).
- 1035 42 Whitmore, L. & Wallace, B. A. DICHROWEB, an online server for protein secondary  
1036 structure analyses from circular dichroism spectroscopic data. *Nucleic Acids Res* **32**,  
1037 W668-673, doi:10.1093/nar/gkh371  
1038 32/suppl\_2/W668 [pii] (2004).
- 1039 43 Sreerama, N. & Woody, R. W. Estimation of protein secondary structure from circular  
1040 dichroism spectra: comparison of CONTIN, SELCON, and CDSSTR methods with an  
1041 expanded reference set. *Anal Biochem* **287**, 252-260, doi:10.1006/abio.2000.4880  
1042 S0003-2697(00)94880-2 [pii] (2000).
- 1043 44 Battye, T. G., Kontogiannis, L., Johnson, O., Powell, H. R. & Leslie, A. G. iMOSFLM: a  
1044 new graphical interface for diffraction-image processing with MOSFLM. *Acta*  
1045 *Crystallogr D Biol Crystallogr* **67**, 271-281, doi:10.1107/S0907444910048675 (2011).
- 1046 45 Winn, M. D. *et al.* Overview of the CCP4 suite and current developments. *Acta*  
1047 *Crystallogr D Biol Crystallogr* **67**, 235-242, doi:10.1107/S0907444910045749 (2011).
- 1048 46 McCoy, A. J. *et al.* Phaser crystallographic software. *Journal of applied crystallography*  
1049 **40**, 658-674, doi:10.1107/S0021889807021206 (2007).
- 1050 47 Emsley, P. & Cowtan, K. Coot: model-building tools for molecular graphics. *Acta*  
1051 *Crystallogr D Biol Crystallogr* **60**, 2126-2132 (2004).
- 1052 48 Adams, P. D. *et al.* PHENIX: a comprehensive Python-based system for macromolecular  
1053 structure solution. *Acta Crystallogr D Biol Crystallogr* **66**, 213-221,  
1054 doi:10.1107/S0907444909052925 (2010).
- 1055 49 Davis, I. W. *et al.* MolProbity: all-atom contacts and structure validation for proteins and  
1056 nucleic acids. *Nucleic Acids Res* **35**, W375-383 (2007).

1057 50 Giaimo, B. D., Ferrante, F. & Borggrefe, T. Chromatin Immunoprecipitation (ChIP) in  
1058 Mouse T-cell Lines. *Journal of visualized experiments : JoVE*, doi:10.3791/55907  
1059 (2017).

1060 51 Liefke, R. *et al.* Histone demethylase KDM5A is an integral part of the core Notch-RBP-  
1061 J repressor complex. *Genes Dev* **24**, 590-601 (2010).

1062 52 Giaimo, B. D. *et al.* Histone variant H2A.Z deposition and acetylation directs the  
1063 canonical Notch signaling response. *Nucleic Acids Res* **46**, 8197-8215,  
1064 doi:10.1093/nar/gky551 (2018).

1065 53 Oswald, F. *et al.* A phospho-dependent mechanism involving NCoR and KMT2D  
1066 controls a permissive chromatin state at Notch target genes. *Nucleic Acids Res* **44**, 4703-  
1067 4720 (2016).

1068 54 Trapnell, C., Pachter, L. & Salzberg, S. L. TopHat: discovering splice junctions with  
1069 RNA-Seq. *Bioinformatics* **25**, 1105-1111, doi:10.1093/bioinformatics/btp120 (2009).

1070 55 TW, H. B. & Girke, T. systemPipeR: NGS workflow and report generation environment.  
1071 *BMC Bioinformatics* **17**, 388, doi:10.1186/s12859-016-1241-0 (2016).

1072 56 Lawrence, M. *et al.* Software for computing and annotating genomic ranges. *PLoS*  
1073 *Comput Biol* **9**, e1003118, doi:10.1371/journal.pcbi.1003118 (2013).

1074 57 Love, M. I., Huber, W. & Anders, S. Moderated estimation of fold change and dispersion  
1075 for RNA-seq data with DESeq2. *Genome biology* **15**, 550, doi:10.1186/s13059-014-  
1076 0550-8 (2014).

1077 58 Yu, G., Wang, L. G., Han, Y. & He, Q. Y. clusterProfiler: an R package for comparing  
1078 biological themes among gene clusters. *OMICS* **16**, 284-287, doi:10.1089/omi.2011.0118  
1079 (2012).

1080  
1081  
1082  
1083  
1084  
1085  
1086  
1087  
1088  
1089  
1090  
1091  
1092  
1093  
1094  
1095  
1096  
1097  
1098  
1099  
1100  
1101  
1102
